# Supplementary material for: Load application in wind turbine blades modelled as reduced-order multibody structures in the floating frame of reference formulation
Source: Copernicus journal article supplement (doi:10.5194/wes-2025-235), 2025-12-01
Supplement: Supplementary file [file wes-2025-235-AC1-supplement.pdf]

# **Review answers: “Load application in wind turbine blades modelled as reduced-order multibody structures in the floating frame of reference formulation”**

Ana Margarida Antunes, Andreas Zwölfer, David Robert Verelst,  
Riccardo Riva, Philipp Ulrich Haselbach and Taeseong Kim

13 May 2026

## **General comments**

We would like to thank both reviewers for their careful reading of our manuscript and for their constructive comments and suggestions. Their feedback has allowed us to substantially improve the clarity and overall quality of the manuscript.

Individual comments are addressed below. In response to the reviewers' comments, we have made a number of changes to the manuscript; an updated version including tracked changes is appended at the end of this document. It should be noted that the colour palette of the comparison plots has also been changed to be colour-blind friendly.

## Referee 1

The manuscript presents a formulation for beam-like structures, as those used in wind turbine blades, based on substructuring from 3D finite element models and the assembly of macrostructural components using the Floating Frame of Reference Formulation (FFRF) to account for moderate displacements and geometric nonlinearities.

The manuscript focuses in particular on the introduction of distributed loads (e.g., of aerodynamic nature) based on low-fidelity formulations, such as Blade Element (BE) methods (often associated with Momentum Theory, although this aspect is not directly relevant here). These approaches provide beam-oriented, spanwise load distributions in the form of forces and moments per unit span (typically lift, drag, and aerodynamic moment, i.e., two force components and one moment, defined at the aerofoil section). As a consequence, such loads must be re-distributed onto a more detailed structural mesh, which includes chordwise (and thickness-wise) geometric resolution.

Overall, the manuscript is well written, lies within the scope of the journal, and appropriately references previous work. A significant amount of results is presented and generally well discussed, supporting the characteristics and features of the proposed formulation and its claimed improvements with respect to the state of the art.

My main criticism concerns the consistency of modeling fidelity across different aspects of the analysis. Increasing the level of fidelity of one part of the model should be accompanied by a corresponding increase in fidelity in other, closely related aspects. In particular, increasing the structural detail should ideally be paired with a commensurate increase in load modeling fidelity. Otherwise, a beam model with accurate section characterization and strain/stress recovery may yield comparable-quality results at significantly lower computational and modeling cost. This issue is partly discussed in the manuscript and is central to the topic of the work; however, it might benefit from being more clearly framed in the introduction, as it already underpins much of the subsequent discussion of the results.

**A:** Thank you for your comments. We agree that the increase in structural modelling fidelity we propose could ideally be accompanied by an increase in load modelling fidelity (in this case, increasing the fidelity of the aerodynamic model). However, this is outside the scope of this work, which aims at assessing the challenges of integrating a different structural model into a wind turbine aeroelastic code (HAWC2) without any further changes to the model (including the aerodynamic BEM-based model). It is also the case that current BEM-based models are quite accurate, so the use of a higher-fidelity aerodynamic model (e.g., panel methods, full 3D CFD), which would increase the computational cost, might not be justified for our use case.

As suggested, this has been clarified in the Introduction, which now reads:

*“One of the challenges in doing so relates to the application of external aerodynamic loads. In HAWC2 and most wind turbine aeroelastic simulation tools, the Blade Element Momentum (BEM) theory [1] is used to calculate the aerodynamic loads acting on the rotor blades [2]. Lift and drag forces per unit span of the blade are calculated at different spanwise locations, such that a distributed load is obtained along the blade span. For steady state operational conditions, these distributed loads predicted by BEM show good agreement with higher-fidelity free-wake lifting-line (LL) method [3, 4] and 3D blade-resolved Reynolds-averaged Navier-Stokes (RANS) solvers, as shown for straight and curved blades in [5, 6].*

*This type of load distribution is easily transferred to a beam model (one-dimensional), but not to a reduced-order structural model based on three-dimensional solid elements. Ideally, for such a model, it would be possible to apply the actual pressure distribution acting on*

*the blade surface, and therefore accompany the increase in structural model fidelity with an increase in fidelity of the aerodynamic model as well. However, this would result in a further increase in computational cost, which might not be justified given the stated accuracy of the BEM-based aerodynamic models currently available. Therefore, while it may constitute an important line of future research, this is outside the scope of this paper, which aims at evaluating the challenges in integrating a higher-fidelity structural model into HAWC2 (or similar wind turbine aeroelastic simulation tools) without further changes to the modelling of aerodynamic loads or other phenomena.”*

Detailed comments follow:

- Line 5: “.. constituting a higher-fidelity alternative to beam elements, ...”

The objective is certainly admirable; however, it would be useful to explain and justify more explicitly why and in which sense this higher fidelity is beneficial, possibly providing quantitative or qualitative measures of improvement.

**A:** The use of solid elements (instead of beam elements) is justified by previous model verification studies, which identified specific structural phenomena as the root cause of less accurate nonlinear static responses computed by beam models. By using solid elements, we expect to compute generally more accurate results (since such phenomena are not neglected, as is the case with beam models).

The Introduction has been rewritten to clarify this point, as:

*“Beam models have the advantage of being computationally efficient, but they are not as accurate as higher-fidelity finite element (FE) models, such as shell or solid elements models. Recent verification studies [7, 8] have concluded that specific effects disregarded by these beam models have a non-negligible influence on the nonlinear static response of slender and complex beam-like structures undergoing large deflections, as is the case of current wind turbine blades; cross-sectional deformation and three-dimensional effects are amongst such effects.”*

- Lines 7-8: “... of calculating equivalent concentrated loads and applying them to the model using interpolation multipoint constraints (RBE3).”

Again, increasing the fidelity of a part of the analysis may be of limited value if related aspects are not enhanced accordingly. In this case, adding section-wise structural detail may be of limited benefit if the distributed loads do not provide comparable spatial resolution. This would not be the case, for example, if higher-fidelity aerodynamic models such as full 3D CFD, or even mid-fidelity methods (lifting-surface, vortex-lattice, or panel methods), were employed.

**A:** Please see our first answer, which addresses this point. As mentioned there, the Introduction now reflects this point more clearly. However, since we also believe that this would be a relevant topic to study, we have added it as future work (in the Conclusions section):

*“Another promising research direction is the coupling of this model with higher-fidelity aerodynamic models (e.g., 3D CFD, vortex lattice or panel methods) for applications beyond the one considered in this work.”*

- Line 12: “... minimum strain energy interfaces increase the stiffness of the model.”

This statement appears to contradict, at least in part, the subsequent discussion. Please clarify this point and reconcile it with the later arguments.

**A:** We agree that this statement is misleading, since the minimum strain energy interfaces formulation should not, by itself, introduce artificial stiffness in the model (as opposed to rigid interfaces). We believe that the increase in stiffness observed in the natural frequency

comparison plots (namely Figures 9 and 14) is a result of the method followed to create the models with both interface modes (for the substructuring interfaces) and MSE interfaces (for the internal load interfaces) – i.e., the steps described in Section 3.1.1. –, and not the introduction of the MSE interfaces by itself.

For this reason, we have updated all mentions in the manuscript to this fact, such that they read *“the reduced-order models built with minimum strain energy load interfaces”* or *“the method including minimum strain energy load interfaces”*, as this is a more accurate depiction of the observed results.

- Lines 25, 32-33, and 40: the authors first state that HAWC2 departs from GEBF in that it uses the FFRF (line 25); then they state that HAWC2 uses (Timoshenko) beam elements (line 32); subsequently, by contrast, they state that the proposed model (following Antunes et al.) is based on “solid finite elements” (line 33), but conclude that “[s]uch a model is able to compute accurate nonlinear static responses when compared to standard solid finite element models” (line 40). This sentence leaves some ambiguity as to whether and how the proposed approach differs from “standard solid finite element models.” I believe this entire section would benefit from a revision aimed at more clearly describing the characteristics of each method and how they compare to and improve upon one another.

**A:** This section has been rewritten for improved readability, and the appended version of the manuscript with tracked changes can be consulted to more easily verify the changes made to this end. Amongst these, the below sentences hopefully make the distinction between the different modelling approaches mentioned clearer:

- *“This work focuses on the latter FFRF-based multibody approach, and HAWC2 is considered as the reference wind turbine aeroelastic code in this analysis.”*
- *“For this reason, while the model considered here is based on the multibody FFRF (similarly to HAWC2), it relies on solid elements to model the local deformation at the sub-body level (instead of beam elements)”*

- Lines 73-78: some clarifications along the lines of the previous point are provided here. It may be beneficial to anticipate and integrate this discussion with that presented earlier, in order to improve coherence and avoid repetition.

**A:** This paragraph has been kept, as we believe it contributes to the clarity of the manuscript. However, we have added an additional *“Recall that”* at its beginning, given the fact that this has already been mentioned in the Introduction.

- Lines 144-147: The need for compatible connecting interfaces is clear; however, how this compatibility is achieved using a singular value decomposition (SVD) is not. Please clarify this point, at least conceptually, without necessarily introducing all implementation details.

**A:** This paragraph has been rewritten to clarify the outcome of the SVD in this context, as: *“To ensure compatibility between connecting interfaces, a common interface reduction basis needs to be calculated for each pair of connecting interfaces (from different sub-bodies), which is used to update the individual matrices in Eq. (12); this is achieved through the Singular Value Decomposition (SVD) of the augmented matrix including the interface modes of the connecting interfaces from adjacent sub-bodies  $\begin{bmatrix} \Psi_{b,B1}^k & \Psi_{b,B0}^{k+1} \end{bmatrix}$ , which computes a common orthonormal basis for this augmented set of interface modes.”*

- Lines 155-157: *“... partitioning a structure into multiple sub-bodies (multibody approach) is required to be able to model nonlinear deflections with the FFRF, as it computes a linear response for each sub-body.”*

This is not only a matter of large deflections, but also of preload effects and geometric stiffness contributions. In wind turbine blades, the stiffening effect due to tension induced by centrifugal loads can be quite significant (and even more so in helicopter rotor blades).

**A:** We agree that this is indeed an important factor to mention (i.e., the fact that geometrical stiffening and other geometrically nonlinear effects are also accounted for when using the multibody FFRF), so the following sentence has been added to this paragraph: *“It is also fundamental for capturing other important nonlinear effects, such as geometrical stiffening arising from centrifugal loading.”*

- Lines 257-267: I suggest decoupling the description of the Exudyn implementation from the theoretical formulation. The formulation should be presented first, possibly followed by a brief discussion of implementation aspects and specific details.

**A:** This part has been rewritten to some extent, such that more details regarding the theoretical formulation of the RBE3 multipoint constraints utilised for the purpose of applying concentrated loads to a given cross-section of the model are given; please consult the appended document with tracked changes to verify these additions. However, since there are different ways to calculate the average orientation for such a multipoint constraint, it was not possible to completely decouple the Exudyn implementation from the theoretical description – it is therefore mentioned in this section that *“the implementation of the object MarkerSuperElementRigid in Exudyn is adopted”*.

- Line 351: “The cross-sectional properties of the beam in HAWC2 are computed using BECAS v4.0...” If the approach described in

Masarati et al., “Substructuring-Based Accurate Beam Section Characterization from Finite Element Analysis,” *Computers & Structures*, <https://doi.org/10.1016/j.compstruc.2025.107720>

(based on Masarati, 2020), is adopted, the same mesh and material properties used for the 3D model could also be used to characterize the beam section. This would avoid the need for an external tool or a separate finite element analysis.

**A:** The approach mentioned is quite interesting, and we believe it can be especially useful for verifying the results from dedicated 2D cross-sectional analysis tools. However, to the best of our understanding, this approach requires that the various beam chunks analysed are “geometrically and structurally identical”. This would mean that, for a wind turbine blade (with spanwise varying geometry and properties), a separate analysis and 3D FE model would need to be built for each cross-section to be analysed, such that we have an “extruded” chunk from each cross-section.

## References

- [1] H. Glauert, “Airplane propellers,” in *Aerodynamic Theory: A General Review of Progress Under a Grant of the Guggenheim Fund for the Promotion of Aeronautics*. Berlin, Heidelberg: Springer Berlin Heidelberg, 1935, pp. 169–360, ISBN: 978-3-642-91487-4. DOI: [10.1007/978-3-642-91487-4\\_3](https://doi.org/10.1007/978-3-642-91487-4_3).
- [2] H. A. Madsen, T. J. Larsen, G. R. Pirrung, A. Li, and F. Zahle, “Implementation of the blade element momentum model on a polar grid and its aeroelastic load impact,” *Wind Energy Science*, vol. 5, no. 1, pp. 1–27, 2020. DOI: [10.5194/wes-5-1-2020](https://doi.org/10.5194/wes-5-1-2020).

- [3] N. Ramos-García, J. N. Sørensen, and W. Z. Shen, “Three-dimensional viscous-inviscid coupling method for wind turbine computations,” *Wind Energy*, vol. 19, no. 1, pp. 67–93, 2016. DOI: [10.1002/we.1821](https://doi.org/10.1002/we.1821).
- [4] N. Ramos-García, M. M. Hejlesen, J. C. Sørensen, and J. H. Walther, “Hybrid vortex simulations of wind turbines using a three-dimensional viscous–inviscid panel method,” *Wind Energy*, vol. 20, no. 11, pp. 1871–1889, 2017. DOI: [10.1002/we.2126](https://doi.org/10.1002/we.2126).
- [5] A. Li, M. Gaunaa, G. R. Pirrung, and S. G. Horcas, “A computationally efficient engineering aerodynamic model for non-planar wind turbine rotors,” *Wind Energy Science*, vol. 7, no. 1, pp. 75–104, 2022. DOI: [10.5194/wes-7-75-2022](https://doi.org/10.5194/wes-7-75-2022).
- [6] A. Li, M. Gaunaa, and G. R. Pirrung, “Computationally efficient aerodynamic modelling of swept wind turbine blades using coupled near-wake and vortex cylinder models,” *Wind Energy Science*, vol. 10, pp. 2515–2550, 2025. DOI: [10.5194/wes-10-2515-2025](https://doi.org/10.5194/wes-10-2515-2025).
- [7] A. M. Antunes et al., “Static response of wind turbine blades: Comparison of low- and high-fidelity numerical models,” *Journal of Physics: Conference Series*, vol. 2767, no. 5, p. 052 037, 2024. DOI: [10.1088/1742-6596/2767/5/052037](https://doi.org/10.1088/1742-6596/2767/5/052037).
- [8] A. M. Antunes, D. R. Verelst, R. Riva, P. U. Haselbach, and T. Kim, “Static response of beam-like structures for the analysis of wind turbine blades with different levels of fidelity,” in *AIAA SciTech Forum*, Jan. 2025. DOI: [10.2514/6.2025-1233](https://doi.org/10.2514/6.2025-1233).

# Load application in wind turbine blades modelled as reduced-order multibody structures in the floating frame of reference formulation

Ana Margarida Antunes<sup>1</sup>, Andreas Zwölfer<sup>2</sup>, David Robert Verelst<sup>1</sup>, Riccardo Riva<sup>1</sup>, Philipp Ulrich Haselbach<sup>1</sup>, and Taeseong Kim<sup>1</sup>

<sup>1</sup>Department of Wind and Energy Systems, Technical University of Denmark, Frederiksborgvej 399, Roskilde, 4000, Denmark

<sup>2</sup>Chair of Applied Mechanics, Department of Mechanical Engineering, TUM School of Engineering and Design, Technical University of Munich, Boltzmannstr. 15, Garching, 85748, Germany

**Correspondence:** Ana Margarida Antunes (anantu@dtu.dk)

## Abstract.

Wind turbine aeroelastic simulation tools usually rely on the Blade Element Momentum (BEM) theory to calculate aerodynamic loads and a beam finite element model for the structural response. A method to transfer distributed aerodynamic loads computed by these aeroelastic codes to a multibody reduced-order model based on the Floating Frame of Reference Formulation (FFRF) is presented. The model is based on solid finite elements, thus constituting a higher-fidelity alternative to beam elements, and the number of degrees of freedom (DOFs) is reduced using the Hurty/Craig-Bampton method and interface reduction based on interface modes. The proposed method consists of calculating equivalent concentrated loads and applying them to the model using interpolation multipoint constraints (RBE3). Two approaches are introduced to avoid applying loads to the internal DOFs of the reduced-order model, by including internal interfaces at the load application cross-sections, either described by interface modes or using a minimum strain energy formulation. Results show that adding load interfaces can improve the static response to torsional moments, but the overall increase in accuracy is not substantial; additionally, it is found that [the reduced-order models built with minimum strain energy interfaces increase the stiffness of the model](#) [load interfaces demonstrate an increased stiffness](#). The methodology is also applied to a 12.6 m wind turbine blade, showcasing the better torsional response of the model when compared with standard beam models.

## 1 Introduction

The capacity and rotor size of wind turbines have greatly increased over the last decades. Longer and more flexible blades are now built, which experience large deflections under operation that can reach up to 20% of their length (Gözcü and Dou, 2020). This brings new challenges to the aeroelastic modelling of wind turbines, which should not only capture the geometrical nonlinear effects inherent to large deflections, but also other structural phenomena originating from the complex geometry and composite materials of wind turbine blades. Having a realistic and accurate structural model is essential to correctly predict wind turbines' power production, stability and loading conditions (Wang et al., 2016).

The wind turbine aeroelastic simulation tools currently available use beam-based models to represent the blades. Geometrically nonlinear effects are included by either using a nonlinear beam formulation, such as the Geometrically Exact Beam Theory (GEBT) (Reissner, 1973; Simo, 1985), or by modelling the blades as multibody systems using the Floating Frame of Reference Formulation (FFRF) (Shabana, 2020) with linear beam elements. The former strategy is implemented in OpenFAST (BeamDyn) (Wang et al., 2017), whereas the latter is employed in HAWC2 (Larsen and Hansen, 2021) or Bladed (DNV GL Energy, 2014), for example.

~~In this work, a structural model developed using the~~ This work focuses on the latter FFRF-based multibody approach ~~is considered, and HAWC2 is considered as the reference wind turbine aeroelastic code in this analysis.~~

In the FFRF, the motion of a body is described by the superposition of global rigid body motion and local deformation (assumed to be linear elastic), with respect to a body-fixed coordinate system, the floating frame (FF). This means that it is suited for bodies that undergo large rigid body displacements and rotations, but only small local deformations and strains (Shabana, 2020; Zwölfer and Gerstmayr, 2020). To be able to compute large nonlinear deflections of wind turbine blades with this formulation, these need to be modelled as multiple sub-bodies, connected using constraint equations to ensure compatibility between them.

The structural model in HAWC2 follows this approach, having each sub-body composed of Timoshenko beam elements (Kim et al., 2013). ~~In contrast, the model considered here is based on solid finite elements. This is done to increase the level of fidelity of the underlying~~ Beam models have the advantage of being computationally efficient, but they are not as accurate as higher-fidelity finite element (FE) ~~model and thus be able to capture effects otherwise disregarded by beam models. These are, for example, cross-sectional deformation, three-dimensional effects, and abrupt changes in structural properties, which have been found to influence~~ models, such as shell or solid elements models. Recent verification studies (Antunes et al., 2024, 2025a) have concluded that specific effects disregarded by these beam models have a non-negligible influence on the nonlinear static response of slender ~~structures, such as and complex beam-like structures undergoing large deflections, as is the case of current~~ wind turbine blades ~~(Antunes et al., 2024, 2025a); cross-sectional deformation and three-dimensional effects are amongst such effects.~~

~~For~~ For this reason, while the model considered in this work is based on the multibody FFRF (similarly to HAWC2), it relies on solid elements to model the local deformation at the sub-body level (instead of beam elements), thus being able to account for the above-mentioned structural effects. However, for computational efficiency reasons, model order reduction techniques are ~~also additionally~~ employed to reduce the number of flexible degrees of freedom (DOFs) ~~representing the local deformation of each sub-body (modelled with solid elements).~~ A comprehensive description of this model can be found in Antunes et al. (2025b).

Such a model is able to compute accurate nonlinear static responses when compared to standard solid finite element models, while having a lower number of DOFs (Antunes et al., 2025b). It is therefore relevant to assess its suitability for integration in a similar framework to that of wind turbine aeroelastic simulation tools using the same FFRF-based multibody approach, ~~such~~ as (e.g., HAWC2).

One of the challenges in doing so relates to the application of external aerodynamic loads. In HAWC2 and most wind turbine aeroelastic simulation tools, the Blade Element Momentum (BEM) theory (Glauert, 1935) is used to calculate the aerodynamic loads acting on the rotor blades (Madsen et al., 2020). Lift and drag forces per unit span of the blade are calculated at different spanwise locations, such that a distributed load is obtained along the blade span. For steady state operational conditions, these distributed loads predicted by BEM show good agreement with higher-fidelity free-wake lifting-line (LL) method (Ramos-García et al., 2016, 2017) and 3D blade-resolved Reynolds-averaged Navier-Stokes (RANS) solvers, as shown for straight and curved blades in Li et al. (2022, 2025).

This type of load distribution is easily transferred to a beam model (one-dimensional), but not to a reduced-order structural model based on three-dimensional solid elements. Ideally, for such a model, it would be possible to apply the actual pressure distribution acting on the blade surface; ~~however, this is not available from BEM theory,~~ and therefore accompany the increase in structural model fidelity with an increase in fidelity of the aerodynamic model as well. However, this would result in a further increase in computational cost, which might not be justified given the stated accuracy of the BEM-based aerodynamic models currently available. Therefore, while it may constitute an important line of future research, this is outside the scope of this paper, which aims at evaluating the challenges in integrating a higher-fidelity structural model into HAWC2 (or similar wind turbine aeroelastic simulation tools) without further changes to the modelling of aerodynamic loads or other phenomena.

Consequently, alternative methods are required to apply this aerodynamic load distribution to the model considered here. The challenge lies not only in having a model based on solid elements, but also in the fact that it is a reduced-order model, so not all physical DOFs are available to apply the loads. It is therefore important to assess whether the approximations introduced by this fact are acceptable or, if not, which methods can be adopted to have more realistic loads. This constitutes the main objective of this paper: to investigate different load application strategies for this model.

The paper is organized as follows: in Section 2, the FFRF-based reduced-order model from solid finite elements under analysis is described (Section 2.1), as well as the structural model in HAWC2 (Section 2.2); in Section 3, a summary of the loads acting on wind turbine blades and existing load transfer methods between aeroelastic models and high-fidelity FE models is presented, followed by a review of the challenges associated with applying such loads to the model under analysis and strategies used to surpass them (Section 3.1); in Section 4, the nonlinear static response of two structures is analysed under different load cases, to demonstrate the impact of the different load application challenges and strategies described: a simple isotropic beam and a 12.6 m wind turbine blade manufactured at DTU constitute the structures investigated, in Section 4.1 and Section 4.2, respectively.

## 2 Structural models

This study is focused on the FFRF-based reduced-order model built from solid finite elements presented in Antunes et al. (2025b). It uses the same baseline formulation as HAWC2, the floating frame of reference formulation (FFRF).

This formulation makes use of a body-fixed coordinate system, the floating frame (FF), defined with respect to a global inertial coordinate system, to describe the kinematics of the body. The global position of a point ( $\mathbf{r}_j \in \mathbb{R}^{3 \times 1}$ ) in the body is

expressed by its translational, rotational and flexible/elastic components, (Shabana, 2020)

$$90 \quad \mathbf{r}_j = \mathbf{q}_t + \mathbf{A}\bar{\mathbf{u}}_j, \quad (1)$$

where  $\mathbf{q}_t \in \mathbb{R}^{3 \times 1}$  is the position of the floating frame,  $\bar{\mathbf{u}}_j \in \mathbb{R}^{3 \times 1}$  is the local position of the point (expressed in the FF) and  $\mathbf{A} = \mathbf{A}(\boldsymbol{\theta}) \in \mathbb{R}^{3 \times 3}$  is the orientation matrix of the FF (expressed in the global coordinate system), with  $\boldsymbol{\theta} \in \mathbb{R}^{n_r \times 1}$  a rotational parametrization with  $n_r$  rotational DOFs.

The Recall that the main difference between the model being studied and HAWC2 lies in the formulation used to describe the  
 95 local deformation of the body: while HAWC2 relies on Timoshenko beam elements, this model is based on solid finite elements in conjunction with model order reduction techniques. Additionally, a distinct version of the FFRF is adopted in the present model, denominated nodal-based FFRF. This means that the local position of a point in the body can be described directly by the nodal displacements, without the need to explicitly introduce the shape functions of the element in the formulation (Zwölfer and Gerstmayr, 2020).

100 ~~Nonlinear large deflections are modelled by both models in a similar way. Both HAWC2 and the present model account for nonlinear large deflections~~ using the multibody approach: each structure is partitioned into multiple sub-bodies, each with its own FF, connected through constraint equations ~~These constraint equations that~~ ensure compatibility between ~~the position and orientation of~~ connecting interfaces. ~~The difference here~~ In this regard, the difference lies in what constitutes an interface between sub-bodies ~~for in~~ each model: in HAWC2, ~~this is straightforward, since it is only one it corresponds to one beam~~ node  
 105 from each sub-body; ~~however, in the model here studied,~~ whereas in the present model an interface is defined by multiple nodes reduced to a set of given DOFs with model order reduction techniques. ~~In this case~~ Evidently, the constraint equations need to be adapted to the DOFs available in each case and are thus fundamentally different (Antunes et al., 2025b).

A more detailed description of these structural models is given in Sections 2.1 and 2.2 below.

## 2.1 Multibody FFRF-based reduced-order model from solid finite elements

110 The model under analysis is described in detail in Antunes et al. (2025b). It is based on the nodal-based FFRF with projection-based model order reduction, as presented in Zwölfer and Gerstmayr (2021). The starting point is a flexible body discretised into displacement-based solid finite elements, with a total of  $n_n$  nodes.

Model-order reduction (projection-based) is introduced to approximate the nodal flexible displacements  $\bar{\mathbf{c}}_f \in \mathbb{R}^{3n_n \times 1}$ , expressed in the FF ( $\bar{\bullet}$ ), by

$$115 \quad \bar{\mathbf{c}}_f = \bar{\boldsymbol{\Psi}}\boldsymbol{\zeta}, \quad (2)$$

where  ~~$\bar{\boldsymbol{\Psi}}$~~   $\bar{\boldsymbol{\Psi}} \in \mathbb{R}^{3n_n \times n_f}$  is the reduction basis and  ~~$\boldsymbol{\zeta}$  denotes the~~  $\boldsymbol{\zeta} \in \mathbb{R}^{n_f \times 1}$  denotes the  $n_f$  reduced flexible generalised coordinates. The FFRF coordinates thus read  $\mathbf{q} = \begin{bmatrix} \mathbf{q}_t^\top & \boldsymbol{\theta}^\top & \boldsymbol{\zeta}^\top \end{bmatrix}^\top$ .

The global nodal positions  $\mathbf{r} \in \mathbb{R}^{3n_n \times 1}$  are calculated as

$$\mathbf{r} = \boldsymbol{\Phi}_t \mathbf{q}_t + \mathbf{A}_{bd} \bar{\mathbf{x}} + \mathbf{A}_{bd} \bar{\boldsymbol{\Psi}} \boldsymbol{\zeta}, \quad (3)$$

120 where  $\Phi_t = \begin{bmatrix} \mathbf{I}_{(3 \times 3)} & \cdots & \mathbf{I}_{(3 \times 3)} \end{bmatrix}^\top \in \mathbb{R}^{3n_n \times 3}$  applies the FF translation  $\mathbf{q}_t$  to all nodes,  $\mathbf{A}_{bd} = \text{diag}(\mathbf{A}, \dots, \mathbf{A}) \in \mathbb{R}^{3n_n \times 3n_n}$  is a block-diagonal matrix containing the FF rotation matrix, and  $\bar{\mathbf{x}} \in \mathbb{R}^{3n_n \times 1}$  is composed of the local reference (undeformed) nodal positions.

The equations of motion can be derived from Lagrange's equation, resulting in (Zwölfer and Gerstmayr, 2021)

$$\underbrace{\mathbf{L}^\top \overline{\mathbf{M}} \mathbf{L}}_{\overline{\mathbf{M}}} \ddot{\mathbf{q}} + \underbrace{\mathbf{L}^\top \overline{\mathbf{M}} \dot{\mathbf{L}}}_{-\hat{\mathbf{Q}}_v} \dot{\mathbf{q}} + \underbrace{\mathbf{P}^\top \overline{\mathbf{K}} \mathbf{P}}_{-\hat{\mathbf{Q}}_e} \mathbf{q} + \underbrace{\mathbf{J}^\top \boldsymbol{\lambda}}_{-\hat{\mathbf{Q}}_c} = \underbrace{\mathbf{L}^\top \mathbf{f}}_{\hat{\mathbf{Q}}_a}, \quad (4)$$

125 where  $\overline{\mathbf{M}}, \overline{\mathbf{K}} \in \mathbb{R}^{3n_n \times 3n_n}$  are, respectively, the constant FE mass and stiffness matrices from linear elastodynamics,  $\boldsymbol{\lambda}$  are the Lagrange multipliers enforcing the constraint equations  $\mathbf{g} = \mathbf{0}$ , and  $\mathbf{f} \in \mathbb{R}^{3n_n \times 1}$  are the applied nodal forces.  $\hat{\mathbf{Q}}_a$  represents the applied forces,  $\hat{\mathbf{Q}}_c$  the constraint forces,  $\hat{\mathbf{Q}}_v$  the quadratic velocity vector and  $\hat{\mathbf{Q}}_e$  the elastic forces. Structural damping is not considered. However, Rayleigh proportional damping can be straightforwardly included.

The coordinate and constraint Jacobians are given by

$$130 \quad \mathbf{L} = \frac{\partial \mathbf{r}}{\partial \mathbf{q}} = \begin{bmatrix} \frac{\partial \mathbf{r}}{\partial \mathbf{q}_t} & \frac{\partial \mathbf{r}}{\partial \boldsymbol{\theta}} & \frac{\partial \mathbf{r}}{\partial \boldsymbol{\zeta}} \end{bmatrix} = \begin{bmatrix} \Phi_t & -\mathbf{A}_{bd} \tilde{\mathbf{r}}_f \overline{\mathbf{G}} & \mathbf{A}_{bd} \overline{\boldsymbol{\Psi}} \end{bmatrix}, \quad (5)$$

$$\mathbf{P} = \frac{\partial \bar{\mathbf{c}}_f}{\partial \mathbf{q}} = \begin{bmatrix} \mathbf{0}_{3n_n \times 3} & \mathbf{0}_{3n_n \times n_r} & \overline{\boldsymbol{\Psi}} \end{bmatrix}, \quad (6)$$

$$\mathbf{J} = \frac{\partial \mathbf{g}}{\partial \mathbf{q}}, \quad (7)$$

where  $\overline{\mathbf{G}}$  relates the angular velocity  $\bar{\boldsymbol{\omega}} \in \mathbb{R}^{3 \times 1}$  with the rotational parametrization, as  $\bar{\boldsymbol{\omega}} = \overline{\mathbf{G}} \boldsymbol{\theta}$ , and  $\tilde{\mathbf{r}}_f \in \mathbb{R}^{3n_n \times 3}$  contains the vertically concatenated skew-symmetric matrices of the local nodal positions  $\tilde{\mathbf{r}}_{f_j} = \bar{\mathbf{x}}_j + \bar{\mathbf{c}}_{f_j} \in \mathbb{R}^{3 \times 1}$ .

135 To obtain the reduction basis  $\overline{\boldsymbol{\Psi}}$  in Eq. (2), the Hurty/Craig-Bampton method (Hurty, 1965; Craig Jr and Bampton, 1968) and an interface reduction technique based on local interface modes (Krattiger et al., 2019) are applied sequentially to the FE system of equations. To do so, the flexible DOFs (nodal flexible displacements  $\bar{\mathbf{c}}_f$ ) are first partitioned into internal (*i*) and interface/boundary (*b*) DOFs. As illustrated in Figure 1, the interface DOFs of each sub-body are composed of a minimum of two interfaces, here denoted by substructuring interfaces (**B0 and B1**), located at its ends. These allow the connection  
140 between sub-bodies.

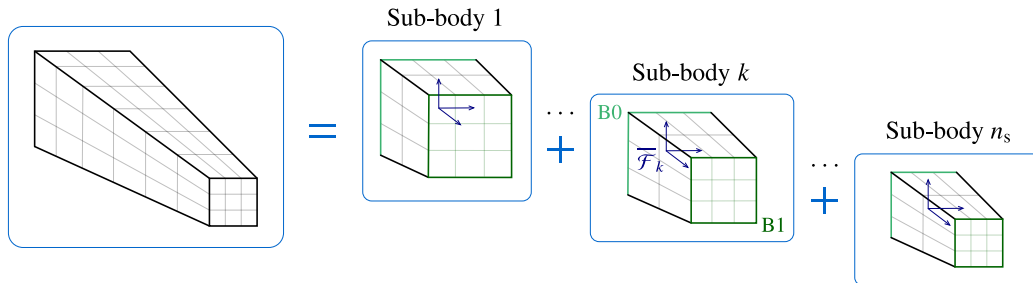

**Figure 1.** Structure partitioned into sub-bodies, each with its own floating frame  $\overline{\mathcal{F}}_k$  and two substructuring interfaces (**B0**, **B1**).

The Hurty/Craig-Bampton method eliminates the internal DOFs by approximating them with static modes augmented with a set of dynamic eigenmodes. Each static mode represents the static response of the internal DOFs to a unit displacement of one interface DOF, while keeping the remaining interface DOFs fixed. The dynamic eigenmodes, also named fixed-interface modes, are a truncated set of  $n_m$  eigenvectors calculated from the generalised eigenvalue problem considering the interface DOFs fixed,

$$(\bar{\mathbf{K}}_{ii} - \omega_m^2 \bar{\mathbf{M}}_{ii}) \bar{\boldsymbol{\varphi}}_{i_m} = \mathbf{0}, \quad (8)$$

where  $\bar{\boldsymbol{\varphi}}_{i_m} \in \mathbb{R}^{n_i \times 1}$  represents the  $m^{\text{th}}$  mode shape of the fixed-interface modes.

The Hurty/Craig-Bampton reduction basis  $\bar{\boldsymbol{\Psi}}_{\text{HCB}} \in \mathbb{R}^{(n_i+n_b) \times (n_b+n_m)}$  is given by (Allen et al., 2020)

$$\bar{\boldsymbol{\Psi}}_{\text{HCB}} = \begin{bmatrix} \bar{\boldsymbol{\Psi}}_{\text{HCB}}^{(\text{stat.})} & \bar{\boldsymbol{\Psi}}_{\text{HCB}}^{(\text{dyn.})} \end{bmatrix} = \begin{bmatrix} \mathbf{I} & \mathbf{0} \\ -\bar{\mathbf{K}}_{ii}^{-1} \bar{\mathbf{K}}_{ib} & \bar{\boldsymbol{\Upsilon}}_i \end{bmatrix} \quad \text{with} \quad \bar{\boldsymbol{\Upsilon}}_i = \begin{bmatrix} \bar{\boldsymbol{\varphi}}_{i_1} & \cdots & \bar{\boldsymbol{\varphi}}_{i_{n_m}} \end{bmatrix}. \quad (9)$$

The reduced generalised flexible coordinates  $\boldsymbol{\zeta}$  are thus composed of the interface flexible nodal displacements  $\bar{\mathbf{c}}_{f_b} \in \mathbb{R}^{n_b \times 1}$  and the modal participation factors  $\boldsymbol{\xi}_i \in \mathbb{R}^{n_m \times 1}$  of the fixed-interface modes.

The [resulting](#) Hurty/Craig-Bampton reduced FE system matrices  $(\bar{\mathbf{M}}_{\text{HCB}}, \bar{\mathbf{K}}_{\text{HCB}})$  can still be large, depending on the number of interface nodes and the discretisation of the solid FE model. For this reason, an interface reduction method is also employed, which applies an additional approximation to the interface DOFs only,

$$\bar{\mathbf{c}}_{f_b} = \bar{\boldsymbol{\Psi}}_b \boldsymbol{\zeta}_b. \quad (10)$$

In this case, the interface DOFs are approximated as a linear combination of mode shapes, calculated from the generalised eigenvalue problem defined considering the portion of the Hurty/Craig-Bampton reduced system matrices relative to the interface DOFs,

$$(\bar{\mathbf{K}}_{\text{HCB}_{bb}} - \omega_m^2 \bar{\mathbf{M}}_{\text{HCB}_{bb}}) \bar{\boldsymbol{\varphi}}_{b_m} = \mathbf{0}, \quad (11)$$

where  $\bar{\boldsymbol{\varphi}}_{b_m} \in \mathbb{R}^{n_b \times 1}$  represents the  $m^{\text{th}}$  mode shape of the interface modes.

These eigenmodes are arranged in a block-diagonal matrix, containing the components relative to each individual interface ([B0 and B1](#)), such that decoupled motion between interfaces is possible,

$$\bar{\boldsymbol{\Psi}}_b = \begin{bmatrix} \bar{\boldsymbol{\Psi}}_{b,\text{B0}} & \mathbf{0} \\ \mathbf{0} & \bar{\boldsymbol{\Psi}}_{b,\text{B1}} \end{bmatrix} \quad \text{with} \quad \bar{\boldsymbol{\Psi}}_{b,\text{BX}} = \begin{bmatrix} \bar{\boldsymbol{\varphi}}_{b,\text{BX}_1} & \cdots & \bar{\boldsymbol{\varphi}}_{b,\text{BX}_{n_{m_b}}} \end{bmatrix}, \quad (12)$$

which requires a QR-orthonormalization to be performed for each individual interface reduction matrix  $\bar{\boldsymbol{\Psi}}_{b,\text{BX}} \in \mathbb{R}^{n_b, \text{BX} \times n_{m_b}}$ , to guarantee linear independence (Krattiger et al., 2019).

To ensure compatibility between connecting interfaces, a common interface reduction [matrix-basis](#) needs to be calculated for each pair of connecting interfaces (from different sub-bodies) [and](#), [which is](#) used to update the individual matrices in [Eq. \(12\)](#); this is achieved [using a through the](#) Singular Value Decomposition (SVD) [of the augmented matrix including the interface](#)

170 [modes of the connecting interfaces from adjacent sub-bodies](#)  $[\Psi_{b,B1}^k \ \Psi_{b,B0}^{k+1}]$ , which computes a common orthonormal basis [for this augmented set of interface modes](#). The final size of  $\bar{\Psi}_b \in \mathbb{R}^{n_b \times n_{m_b}^{\text{tot}}}$  will depend on the number of modes retained when performing the SVD (Antunes et al., 2025b; Krattiger et al., 2019).

The final reduction matrix  $\bar{\Psi} \in \mathbb{R}^{3n_n \times (n_m + n_{m_b}^{\text{tot}})}$  is obtained by combining the Hurty/Craig-Bampton reduction matrix and the interface modes reduction matrix,

$$\bar{\Psi} = \bar{\Psi}_{\text{HCB}} \begin{bmatrix} \bar{\Psi}_b & \mathbf{0} \\ \mathbf{0} & I \end{bmatrix} = \begin{bmatrix} \bar{\Psi}_b & \mathbf{0} \\ -\bar{K}_{ii}^{-1} \bar{K}_{ib} \bar{\Psi}_b & \bar{\Upsilon}_i \end{bmatrix}, \quad (13)$$

175 which means the reduced generalised coordinates are now composed of the modal participation factors of the interface modes  $\zeta_b$  and of the already calculated fixed-interface modes  $\xi_i$ .

By following the above steps, the motion of each sub-body is fully defined by the translation and rotation DOFs of its attached floating frame and the reduced flexible generalised coordinates. The final step is defining the constraint equations needed to connect the sub-bodies and reconstruct the original structure in Figure 1. Recall that partitioning a structure into  
180 multiple sub-bodies (multibody approach) is required to be able to model nonlinear deflections with the FFRF, as it computes a linear response for each sub-body. [It is also fundamental for capturing other important nonlinear effects, such as geometrical stiffening arising from centrifugal loading](#) (Wu and Haug, 1988).

The constraint equations state that the global position of corresponding nodes in connecting interfaces is equal. Due to the interface reduction, the physical DOFs are not available but are expressed as a linear combination of the interface modes; this  
185 requires that the constraint equations are projected onto the subspace of the interface reduction matrix, to avoid having an overdetermined system, as (Antunes et al., 2025b)

$$\left( \Psi_{b,B1}^k \right)^\top \left( \mathbf{r}_{b,B0}^{k+1} - \mathbf{r}_{b,B1}^k \right) = \mathbf{0}, \quad (14)$$

where  $\Psi_{b,B1}^k = \Psi_{b,B0}^{k+1}$  is the interface ~~modes~~ reduction matrix expressed in the global coordinate system. These constraint equations only ensure weak compatibility between interfaces, within the subspace of the interface reduction basis.

190 This model has been implemented in Exudyn (Gerstmayr, 2024), a general-purpose multibody dynamics code. A complete description of the details of this implementation can be found in Antunes et al. (2025b).

## 2.2 HAWC2

HAWC2 (Larsen and Hansen, 2021) is an aeroelastic multibody simulation tool, based on the FFRF, developed to simulate the dynamic response of wind turbines.

195 Linear Timoshenko beam elements constitute the underlying FE model. An anisotropic beam formulation is adopted, accounting for material anisotropy through the definition of fully-populated  $(6 \times 6)$  cross-sectional stiffness matrices. Each element has two nodes, each with six DOFs (three displacements and three rotations), and constant properties are assumed within the element (Kim et al., 2013).

The multibody approach is also adopted to simulate nonlinear deflections of selected wind turbine components, such as the  
200 blades. Each sub-body is characterised by one or more beam elements and has its own floating frame, which is attached to the

first beam node. The constraint equations defined to connect the sub-bodies dictate that the FF of each sub-body follows the global displacement and orientation of the last beam node of the preceding sub-body (Gözcü and Verelst, 2020).

HAWC2 features a static solver, based on the Newton-Raphson method, that can be used for (nonlinear) static analyses (Riva et al., 2024) and has been verified in Antunes et al. (2025a).

### 205 3 Loads on a wind turbine blade

Wind turbines are subjected to multiple load sources, namely aerodynamic loads (steady and unsteady), inertial loads (centrifugal and gyroscopic forces), gravity loads, and hydrodynamic loads (if placed offshore). When designing a wind turbine, a large number of aeroelastic simulations need to be run, emulating the different operational and environmental conditions it will experience during its lifetime. Individual wind turbine components (e.g., blades) are designed based on the loads computed from such simulations, by performing detailed structural analyses assessing their ultimate and fatigue strength, typically using high-fidelity FE models based on shell or solid elements (Hau and Renouard, 2006).

In an aeroelastic simulation tool such as HAWC2, inertial loads are inherently handled by the multibody FFRF, gravity loads are modelled as distributed loads proportional to each body's mass, and aerodynamic loads are computed by its aerodynamic solver, based on ~~the~~ BEM theory (Madsen et al., 2020).

215 The aerodynamic solver computes the aerodynamic sectional loads (lift force, drag force, and pitching moment) for the current structural configuration of the system, thus updating the external applied loads at each iteration (Gözcü and Verelst, 2020). These are loads per unit span, and a linear variation is considered between aerodynamic calculation points. To apply this distributed load to the structural model of each blade, Gauss-Legendre quadrature is used to integrate it along each beam element and obtain equivalent nodal loads.

220 The same method can not be applied directly to the model described in Section 2.1, since the spanwise load integration is not possible with a model based on three-dimensional solid elements. A few different approaches to apply these aerodynamic loads to shell FE models have been reported in the literature (Caous et al., 2018; Forcier and Joncas, 2020; Knill, 2005; Bottasso et al., 2014). These can constitute a baseline to the current use case, given that any modifications needed for a reduced-order version of a high-fidelity FE model are implemented.

225 Two main methodologies are adopted in the literature: either applying an actual pressure distribution, or applying equivalent concentrated loads. The first approach is employed in Knill (2005) and Caous et al. (2018), by making use of two-dimensional aerofoil tools to compute the pressure distribution along a blade section, using the information from aeroelastic simulations; however, it is highlighted in Caous et al. (2018) that this procedure might not result in the same aerodynamic loads that would be applied by the aeroelastic code, so the pressure distribution is corrected based on the beam loads from the aeroelastic simulation. Though this approach would be the most realistic way to apply aerodynamic loads to a high-fidelity FE model, it includes additional calculation steps and might not be necessary to obtain accurate stress and strain fields, as these ~~are found to be mostly dependent~~ depend primarily on the internal loads at a given blade section ~~than rather than on~~ rather than on the locally applied loads (Forcier and Joncas, 2020).

For these reasons, the latter approach of applying equivalent concentrated loads is more commonly used. Within this context, a common denominator in the literature is the use of RBE3 (Rigid Body Element 3) interpolation elements to apply the concentrated loads to a portion of the blade structure (Forcier and Joncas, 2020; Bottasso et al., 2014; Haselbach et al., 2022); these are equivalent to the distributing coupling constraints in Abaqus (Dassault Systèmes, 2023) and avoid artificial stiffening. However, the ~~studies available~~ available studies differ in the choice of FE nodes included in the interpolation constraint and in the calculation of the equivalent concentrated loads: in Forcier and Joncas (2020), the resultant of the linearly varying aerodynamic distributed loads acting at each portion of the blade is applied considering all nodes in that portion coupled to a reference node located at its centre (along the blade longitudinal axis); in Bottasso et al. (2014), aerodynamic and inertial loads are either applied simultaneously to the spar caps nodes of a blade portion or separately, using the skin nodes for the aerodynamic loads and all section nodes for the inertial loads; in Haselbach et al. (2022), loads computed from the internal bending moment distribution obtained from aeroelastic simulations (load envelope) are applied to the elastic centre of chosen blade sections, coupled to the nodes belonging to the spar caps in each section. An alternative to the use of RBE3 elements is distributing ~~loads by the~~ the loads by selected nodes of each blade section, calculated so that the target resultant load is obtained (Maheri et al., 2006).

It is important to note that this work is focused solely on the application of aerodynamic loads, since the multibody FFRF already handles the calculation of inertial loads, and gravity loads are also readily computed as a function of the system mass matrices. Most literature on the topic of load application of aeroelastic loads to high-fidelity FE models is aimed at ultimate and fatigue strength analyses of wind turbine blades based on design loads, which are performed using a completely separate three-dimensional FE model (~~from the aeroelastic code~~). It is for this reason that all load sources need to be considered, and the internal load distribution is often used (Haselbach et al., 2022).

### 3.1 Application to the FFRF-based reduced-order model

As per the equations of motion defined in Eq. (4), the applied generalised forces  $\hat{Q}_a = [\hat{Q}_{at} \quad \hat{Q}_{ar} \quad \hat{Q}_{af}]^T$  are given by (Zwölfer and Gerstmayr, 2021)

$$\hat{Q}_{at} = \sum_{\substack{j=1 \\ f_j \neq 0}}^{n_n} f_j, \quad (15)$$

$$\hat{Q}_{ar} = \bar{G}^T \sum_{\substack{j=1 \\ f_j \neq 0}}^{n_n} \left( \tilde{x}_j + \sum_{m=1}^{n_m} \tilde{\Psi}_{m_j} \zeta_m \right) A^T f_j, \quad (16)$$

260

$$\hat{Q}_{af} = \sum_{\substack{j=1 \\ f_j \neq 0}}^{n_n} \begin{bmatrix} \bar{\Psi}_{1_j}^T \\ \vdots \\ \bar{\Psi}_{n_{m_j}}^T \end{bmatrix} A^T f_j, \quad (17)$$

where  $f_j$  is the applied force on node  $j$ , expressed in the global frame, and  $\bar{\Psi}_{m_j}$  corresponds to the entries of the reduction matrix relative to node  $j$  and mode  $m$ .

It can be seen in Eq. (17) that the applied nodal forces are projected onto the subspace of the reduction matrix  $\bar{\Psi}$ . Depending on the reduction matrix, this might or might not be a good basis for representing certain applied loads accurately. It should be noted that the Hurty/Craig-Bampton method is built on the assumption that there are no forces acting on the internal DOFs; it is therefore expected that any loads not directly applied at the interfaces will introduce an additional error in the model.

If the actual air pressure distribution along the blade surface were available, it could be applied to this model by first obtaining the equivalent nodal loads from the underlying FE model, which make up the vector of applied nodal forces  $f$ ; these can be exported directly from the FEM software (e.g., Abaqus). However, pressure forces are inherently follower loads, i.e., they follow the rotation of the surface on which they are acting as the structure deflects. In a FEM software such as Abaqus, this is achieved by rotating the line of action of the load according to the surface normal (Dassault Systèmes, 2023). This is not straightforward to implement in the current model because, even though it is based on solid finite elements, a reduced set of DOFs models its elastic behaviour; using a similar procedure to update the orientation of applied nodal loads (e.g., using the average from the normals of the elements shared by a node) would ~~diminish the advantages of having a reduced system. require to retain all flexible DOFs and model order reduction techniques could not be used. Alternative load update approaches are thus needed for such an application.~~

As previously mentioned, the pressure distribution is not available from a BEM-based aerodynamic model; instead, the lift, drag and pitching moment per unit span at given aerodynamic sections along the blade are computed. To be able to apply these outputs directly to our model, an approach based on the calculation of equivalent concentrated loads is preferred. Note that such an approach allows for the modelling of follower loads, as the load direction can be updated according to the orientation of the deformed configuration at the respective load application point only.

Similar to Forcier and Joncas (2020), it is proposed that the blade is first divided into equal spanwise portions. For each blade portion, a load distribution composed by of the computed aerodynamic sectional loads assuming linear variation between calculation points is considered, matching the methodology followed in HAWC2. Gauss-Legendre quadrature is used to calculate the resultant loads and the load application point in each blade portion, by using the first moment of area of the resultant aerodynamic force distribution. This method is illustrated in Figure 2.

More specifically, the equivalent concentrated load at each spanwise portion  $\Delta s$  (see Figure 2) is calculated as follows: the different load components are integrated by considering each sub-portion  $\Delta s_i$  (defined by the load calculation points within  $\Delta s$ ) individually and applying the Gauss-Legendre quadrature rule, as

$$P_{\text{res}} = \sum_{\Delta s_i} \int_{s_i^0}^{s_i^0 + \Delta s_i} P(s) ds = \sum_{\Delta s_i} \left( \sum_j^{n_{\text{Gauss}}} w_j P(s_j) \right), \quad (18)$$

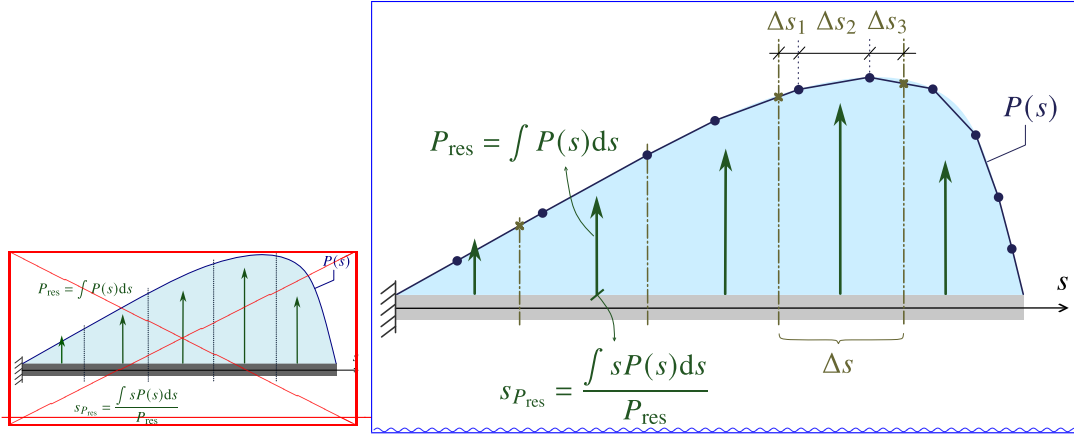

**Figure 2.** Calculation of equivalent concentrated loads from the spanwise load distribution.  $s$ : Coordinate along beam length.  $\Delta s$ : Length of spanwise portion.  $(\bullet)$ : Distributed load value at load calculation points.  $(\times)$ : Linearly interpolated distributed load value at spanwise portions defined.

where  $w_j$  is the weight corresponding to Gauss point  $s_j$ , and  $s_i^0$  is the starting point of each spanwise sub-portion  $\Delta s_i$ . A total of  $n_{\text{Gauss}}$  Gauss points are used, and the load at each Gauss point  $P(s_j)$  is computed by linear interpolation between the two closest load calculation points.

295 A similar procedure is followed to calculate the corresponding load application point, but computing instead the first moment of area  $S_{P_r}$  of the resultant aerodynamic force distribution, considering only the in-plane components (i.e., excluding the axial force component), such that  $P_r(s) = \sqrt{P_{\text{flap}}^2(s) + P_{\text{edge}}^2(s)}$ . This translates to

$$S_{P_r} = \sum_{\Delta s_i} \int_{s_i^0}^{s_i^0 + \Delta s_i} s P_r(s) ds = \sum_{\Delta s_i} \left( \sum_j^{n_{\text{Gauss}}} w_j s_j P_r(s_j) \right), \quad (19)$$

from which the load application point can be calculated as  $s_{P_{\text{res}}} = S_{P_r} / P_{\text{res}}$ . Since a linear load distribution  $P(s)$  is considered, 300 two Gauss points ( $n_{\text{Gauss}} = 2$ ) are sufficient to yield an exact result for Eq. (19).

The concentrated loads calculated this way are applied to the model using **an interpolation multipoint constraints (RBE3 constraint, implemented in Exudyn through the)**. These couple the motion of a group of nodes to that of a main node R, such that the main node follows the weighted average motion of the  $n_c$  coupling nodes defined. Its (global) position  $\mathbf{r}_R \in \mathbb{R}^{3 \times 1}$  is thus calculated as

305 
$$\mathbf{r}_R = \mathbf{q}_t + \mathbf{A} \bar{\mathbf{r}}_{\text{fr}} \quad \text{with} \quad \bar{\mathbf{r}}_{\text{fr}} = \sum_j^{n_c} w_j (\bar{\mathbf{x}}_j + \bar{\mathbf{c}}_{f_j}), \quad (20)$$

where  $w_j$  is the nodal weight attributed to coupling node  $j$  and  $\bar{\mathbf{x}}_j, \bar{\mathbf{c}}_{f_j}$  its local reference position and flexible displacement, respectively. Uniform nodal weights are used throughout this work. The local orientation  $\bar{\boldsymbol{\theta}}_{\text{fr}} \in \mathbb{R}^{3 \times 1}$  of the main node can

be computed in different ways. In this work, the implementation of the object `MarkerSuperElementRigid` in `Exudyn` is adopted (Gerstmayr., 2025), which corresponds to

$$310 \quad \bar{\theta}_{f_R} = \mathbf{W}^{-1} \sum_j^{n_c} \left[ w_j \tilde{\mathbf{p}}_{j,R} \left( \bar{\mathbf{c}}_{f_j} - \sum_i^{n_c} w_i \bar{\mathbf{c}}_{f_i} \right) \right] \quad \text{with } \bar{\mathbf{p}}_{j,R} = \bar{\mathbf{x}}_j - \sum_j^{n_c} w_j \bar{\mathbf{x}}_j, \quad (21)$$

where  $\mathbf{W} = -\sum_j^{n_c} w_j \bar{\mathbf{p}}_{j,R} \bar{\mathbf{p}}_{j,R} \in \mathbb{R}^{3 \times 3}$  represents the inertia tensor of the group of coupling nodes, considering that the nodal weights act as nodal masses. Note that  $\bar{\theta}_{f_R}$  is expressed in terms of the Cartesian rotation vector. The global orientation can be calculated as  $\mathbf{A}_R = \mathbf{A} \exp(\bar{\theta}_{f_R})$ , where  $\exp(\bullet)$  is the exponential map for  $\text{SO}(3)$ . This object distributes the loads (force and moment) applied at a reference node to the group of coupling nodes considered in the multipoint constraint; in this case, the reference node is located at the weighted-average position of the coupling nodes (Gerstmayr., 2025).

Forces and moments applied at the main node ( $\mathbf{f}_R, \mathbf{m}_R \in \mathbb{R}^{3 \times 1}$ ) are transmitted to the coupling nodes as applied nodal forces, which are then converted to generalised applied forces  $\hat{\mathbf{Q}}_{ac}$  as per Eqs. (15)-(17). This can be expressed as (Antunes et al., 2025b)

$$320 \quad \hat{\mathbf{Q}}_{ac} = \mathbf{J}_{\text{pos}}^\top \mathbf{f}_R + \mathbf{J}_{\text{rot}}^\top \mathbf{m}_R, \quad (22)$$

where  $\mathbf{J}_{\text{pos}}, \mathbf{J}_{\text{rot}} \in \mathbb{R}^{3 \times (3+n_r+n_f)}$  are, respectively, the position and rotation Jacobians of the RBE3 multipoint constraint. Given the expressions above for the global position and orientation of the main node R, these correspond to (Gerstmayr., 2025), (Antunes et al., 2025b)

$$320 \quad \mathbf{J}_{\text{pos}} = \begin{bmatrix} \mathbf{I} & -\mathbf{A} \tilde{\mathbf{r}}_{f_R} \bar{\mathbf{G}} & \mathbf{A} \sum_j w_j \bar{\Psi}_{\text{rows}_j} \end{bmatrix}, \quad (23)$$

$$320 \quad \mathbf{J}_{\text{rot}} = \begin{bmatrix} \mathbf{0} & \mathbf{A} \bar{\mathbf{G}} & \mathbf{A} \mathbf{T}(\bar{\theta}_{f_R}) \mathbf{W}^{-1} \sum_j w_j \tilde{\mathbf{p}}_{j,R} \bar{\Psi}_{\text{rows}_j} \end{bmatrix}, \quad (24)$$

with  $\bar{\Psi}_{\text{rows}_j} \in \mathbb{R}^{3 \times n_f}$  representing the rows of the reduction basis relative to node  $j$ .  $\mathbf{T}(\bullet)$  is the tangent operator for  $\text{SO}(3)$ .

For each concentrated load, the group of coupling nodes consists of all nodes belonging to the corresponding spanwise cross-section. The applied forces at these nodes are calculated from the resultant aerodynamic loads with `MarkerSuperElementRigid`; Eqs. (15)-(17) convert them to applied generalised forces. The full cross-section nodes are chosen here, as opposed to all nodes belonging to each blade portion (Forcier and Joncas, 2020) or the spar caps nodes only (Bottasso et al., 2014; Haselbach et al., 2022), mainly for computational efficiency reasons (it leads to a smaller number of multipoint constraint equations than considering the whole blade portion) and simplicity of implementation (choosing only the spar caps nodes limits generalisation and makes the model-approach structure-dependent). Although not demonstrated here, it is found that these different choices for defining the coupling nodes group generally yield similar results.

By following the above method, it is possible to apply multiple concentrated loads to this model that provide equivalent loading conditions to the aerodynamic loads distribution computed by the aerodynamic solver. However, the cross-sections at which these are to be applied do not necessarily coincide with the substructuring interfaces (`B0 and B1`, see Figure 1) defined for each sub-body of the multibody structure representing the wind turbine blade. Having an interface at the load

application points is ideal, since it fulfils the Hurty/Craig-Bampton method assumption of external loads only being applied at interfaces, but that is not possible with the current approach: the number of sub-bodies should be as large as required to get a response converged to the nonlinear solution, but not larger for computational efficiency reasons. The number of load application points will therefore most likely be larger than the number of interfaces and not be placed at the same locations.

There are two options to implement this load application method in the model: the simplest one consists of applying the loads at internal DOFs and projecting them onto the reduction basis subspace as per Eq. (17); the alternative is to include additional (internal) interfaces in each sub-body at the load application cross-sections.

Internal load interfaces can be included by considering the DOFs of the load application cross-sections as interface DOFs in the Hurty/Craig-Bampton method and calculating interface modes not only for the substructuring interfaces ( $\mathbf{B}_0, \mathbf{B}_1$ ), but also for each load interface; these are then added to the block-diagonal interface reduction matrix in Eq. (12). The system size is increased by  $n_{BL} \cdot n_{m_i} \cdot n_{BL} \cdot n_{m_b}$  by doing this, depending on the number of load interfaces ( $n_{BL}$ ).

Since these internal interfaces are added just for load application purposes, there is no need to have a large number of interface modes describing them. However, if the minimum number of six interface modes is used, the load interfaces will behave like rigid (RBE2) interfaces and introduce artificial stiffening in the system (Antunes et al., 2025b). To avoid this but still keep the number of DOFs per load interface to a minimum, one could instead use RBE3 interfaces. However, it is important that interface modes are kept for the substructuring interfaces of each sub-body, because the use of RBE3 interfaces to connect sub-bodies has been found to result in overly flexible structures with poor convergence properties.

RBE3 multipoint constraints define the motion of the reference node as the weighted average of the motion from the coupling nodes. This is the opposite of a rigid (RBE2) constraint, in which the motion of the coupling nodes follows the rigid body motion of the reference node (Ahn et al., 2020). For this reason, it is not possible to express an RBE3 constraint in the form  $\bar{\mathbf{c}}_{i_b} = \bar{\Psi}_b \zeta_b$  and, consequently, incorporate it in the interface reduction matrix together with  $\bar{\Psi}_{b,B_0}$  and  $\bar{\Psi}_{b,B_1}$  computed with interface modes. An analogous formulation developed by Masarati et al. (2020) is therefore used, which is further explained below. Figure 3 summarises the different interface reduction strategies used for each sub-body when internal load interfaces are considered.

### 3.1.1 Minimum strain energy interfaces

The formulation developed by Masarati et al. (2020) starts from the decomposition of the interface nodes motion into a rigid body motion and a deformation motion, described by block-diagonal matrices  $\bar{\mathbf{H}}$  and  $\bar{\mathbf{C}}$ , respectively,

$$\bar{\mathbf{c}}_{i_b} = \bar{\mathbf{H}} \zeta_R + \bar{\mathbf{C}} \zeta_d. \quad (25)$$

For each interface  $\mathbf{B}_{j,BX}$ , the rigid body motion of the interface nodes is a function of the motion of point  $\mathbf{R}_{j,BX}$  located at the weighted average position of the interface nodes, described by generalised coordinates  $\zeta_{R,j,BX} \in \mathbb{R}^{6 \times 1}$  (representing the three displacements and three rotations of point R), and matrix  $\bar{\mathbf{H}}_{j,BX} \in \mathbb{R}^{3n_{j,BX} \times 6}$ , given by

$$\bar{\mathbf{H}}_{j,BX} = \begin{bmatrix} \mathbf{I} & -\tilde{\mathbf{p}}_{j,BX} \end{bmatrix} \quad \text{with} \quad \tilde{\mathbf{p}}_{j,BX} = \bar{\mathbf{x}}_{j,BX} - \bar{\mathbf{x}}_{R,j,BX}, \quad (26)$$

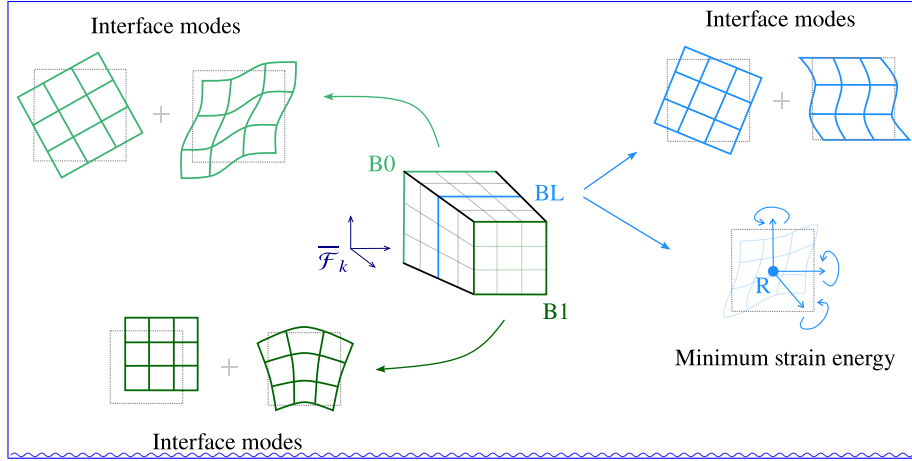

**Figure 3.** Interface reduction methods used for substructuring interfaces ( $\mathbf{B0B0}$ ,  $\mathbf{B1B1}$ ) and internal load interfaces ( $\mathbf{BLBL}$ ).

370 where  $\tilde{\mathbf{p}}_{\text{BX}}$  contains the stacked skew-symmetric matrices of the relative nodal reference positions of ~~the interface nodes~~  $\tilde{\mathbf{p}}_{j,\text{BX}}$  ~~each interface node  $j$~~  relative to point  $\mathbf{R}$ ,  $\tilde{\mathbf{p}}_{j,\text{BX}} \in \mathbb{R}^{3 \times 1}$ .

The deformation motion is described by  $\bar{\mathbf{C}}_{\text{BX}} \in \mathbb{R}^{3n_{\text{BX}} \times (3n_{\text{BX}} - 6)}$ , the complement to the rigid body matrix ~~which requires its orthogonality relative~~  $\bar{\mathbf{H}}_{\text{BX}}$ , ~~which is, by definition, orthogonal~~ to this matrix,  $\bar{\mathbf{C}}_{\text{BX}}^{\top} \bar{\mathbf{H}}_{\text{BX}} = \mathbf{0}$ . Matrix  $\bar{\mathbf{C}}_{\text{BX}}$  represents the warping of the interface relative to the rigid body motion, and the generalised coordinates  $\zeta_{\text{d},\text{BX}} \in \mathbb{R}^{(3n_{\text{BX}} - 6) \times 1}$  are the multi-  
375 plication factors for these warping shapes. This matrix can be obtained from the QR decomposition of  $\bar{\mathbf{H}}_{\text{BX}}$ : matrix  $\bar{\mathbf{C}}_{\text{BX}}$  will correspond to matrix  $\mathbf{Q}_2$ .

A minimum strain energy interface is obtained by enforcing that ~~there is no virtual work is~~ done by the interface forces  $\bar{\mathbf{f}}_b$  for the ~~subspace of the~~ interface warping motion. ~~This is achieved by setting, i.e.,~~  $\bar{\mathbf{C}}_{\text{BX}}^{\top} \bar{\mathbf{f}}_b = \mathbf{0}$  ~~in the equation of static equilibrium with respect to the deformation motion subspace (of matrix  $\bar{\mathbf{C}}$ ),~~ As a result, it is possible to express the interface motion ( $\bar{\mathbf{c}}_{\text{f}_b}$ )  
380 ~~as a function of only the rigid body generalised coordinates  $\zeta_{\text{R}}$ , but in such a way that allows the interface to warp as needed in order to avoid unnecessary force distributions at the interfaces.~~

~~The final interface reduction basis.~~ By applying the principle of virtual work to the expression for the static virtual work at the interface  $\delta W_{\text{s}_b}$ , which is given by (Masarati et al., 2020)

$$\begin{aligned} \delta W_{\text{s}_b} &= \delta W_{\text{s,ext}_b} + \delta W_{\text{s,int}_b} = (\delta \bar{\mathbf{c}}_{\text{f}_b})^{\top} \bar{\mathbf{f}}_b + (\delta \bar{\mathbf{c}}_{\text{f}_b})^{\top} \bar{\mathbf{K}}_{\text{HCB}_{bb}} \bar{\mathbf{c}}_{\text{f}_b} \\ &= (\bar{\mathbf{H}} \zeta_{\text{R}} + \bar{\mathbf{C}} \zeta_{\text{d}})^{\top} [\bar{\mathbf{f}}_b + \bar{\mathbf{K}}_{\text{HCB}_{bb}} (\bar{\mathbf{H}} \zeta_{\text{R}} + \bar{\mathbf{C}} \zeta_{\text{d}})], \end{aligned} \quad (27)$$

385 ~~two equations are obtained,~~

$$\bar{\mathbf{H}}^{\top} \bar{\mathbf{f}}_b - \bar{\mathbf{H}}^{\top} \bar{\mathbf{K}}_{\text{HCB}_{bb}} \bar{\mathbf{H}} \zeta_{\text{R}} - \bar{\mathbf{H}}^{\top} \bar{\mathbf{K}}_{\text{HCB}_{bb}} \bar{\mathbf{C}} \zeta_{\text{d}} = \mathbf{0}, \quad (28)$$

$$\bar{\mathbf{C}}^{\top} \bar{\mathbf{f}}_b - \bar{\mathbf{C}}^{\top} \bar{\mathbf{K}}_{\text{HCB}_{bb}} \bar{\mathbf{H}} \zeta_{\text{R}} - \bar{\mathbf{C}}^{\top} \bar{\mathbf{K}}_{\text{HCB}_{bb}} \bar{\mathbf{C}} \zeta_{\text{d}} = \mathbf{0}, \quad (29)$$

where  $\overline{\mathbf{K}}_{\text{HCB}_{bb}}$  is the portion of the Hurty/Craig-Bampton reduced stiffness matrix relative to the retained interface DOFs. Applying the minimum strain energy interface condition to Eq. (29) allows to express the warping motion of the interface, represented by the generalised coordinates  $\zeta_d$ , as a function of the rigid body generalised coordinates  $\zeta_R$  only, as

$$\zeta_d = - \left( \overline{\mathbf{C}}^\top \overline{\mathbf{K}}_{\text{HCB}_{bb}} \overline{\mathbf{C}} \right)^{-1} \overline{\mathbf{C}}^\top \overline{\mathbf{K}}_{\text{HCB}_{bb}} \overline{\mathbf{H}} \zeta_R. \quad (30)$$

The final interface reduction basis is obtained by substituting Eq. (30) into Eq. (25),

$$\overline{\Psi}_{b,\text{MSE}} = \overline{\mathbf{P}} \overline{\mathbf{H}} \text{ with } \overline{\mathbf{P}} = \mathbf{I} - \overline{\mathbf{C}} \left( \overline{\mathbf{C}}^\top \overline{\mathbf{K}}_{\text{HCB}_{bb}} \overline{\mathbf{C}} \right)^{-1} \overline{\mathbf{C}}^\top \overline{\mathbf{K}}_{\text{HCB}_{bb}}. \quad (31)$$

This formulation is presented as being analogous to a RBE3 multipoint constraint, with the difference that the equivalent rigid body motion of point R-main node R is not solely based on geometric considerations, but rather on the static equilibrium condition at the interfaces.

To use this formulation as an alternative interface reduction method for the internal load interfaces (while keeping the interface modes for the substructuring interfaces of each sub-body), the below steps should be followed:

1. Compute the Hurty/Craig-Bampton reduced matrices ( $\overline{\mathbf{K}}_{\text{HCB}}, \overline{\mathbf{M}}_{\text{HCB}}$ ) considering only the substructuring interfaces ~~B0 and B1~~ B0 and B1 as interface DOFs.
2. Compute the interface modes reduction matrices for the substructuring interfaces  $\overline{\Psi}_{b,B0}$  and  $\overline{\Psi}_{b,B1}$  using the reduced matrices from the previous step.
3. Compute the Hurty/Craig-Bampton reduced matrices considering only the load interfaces as interface DOFs.
4. Compute  $\overline{\Psi}_{b,\text{MSE}}$  for the load interfaces using the reduced matrices from the previous step.
5. Build the final interface reduction matrix,

$$\overline{\Psi}_b = \begin{bmatrix} \overline{\Psi}_{b,B0} & \mathbf{0} & \mathbf{0} \\ \mathbf{0} & \overline{\Psi}_{b,\text{MSE}} & \mathbf{0} \\ \mathbf{0} & \mathbf{0} & \overline{\Psi}_{b,B1} \end{bmatrix}. \quad (32)$$

6. Update  $\overline{\Psi}_{b,B0}$  and  $\overline{\Psi}_{b,B1}$  in the final interface reduction matrices of each sub-body based on the common interface modes bases calculated using SVD between adjacent sub-bodies.
7. Compute the Hurty/Craig-Bampton reduction matrix  $\overline{\Psi}_{\text{HCB}}$  considering all interface DOFs (~~B0, B1~~ B0, B1 and load interfaces).
8. Compute the final reduction matrix using Eq. ~~(13)~~ (13) and  $\overline{\Psi}_{\text{HCB}}$  from the previous step.

It should be noted that different Hurty/Craig-Bampton reduced matrices are used in the calculation of the interface modes and minimum strain energy interface reduction matrices. This is needed to ensure that all six rigid body modes are included in the interface modes basis of ~~B0 and B1~~B0 and B1, which is not the case if the Hurty/Craig-Bampton reduction step is instead  
415 only performed once and the interface modes calculated using the portions from  $\bar{K}_{HCB}$ ,  $\bar{M}_{HCB}$  relative to the interface DOFs belonging to ~~B0 and B1~~B0 and B1.

## 4 Results

The nonlinear static analysis of two cantilever structures is presented. In Section 4.1, a simple isotropic beam is studied with the objective of answering the two main questions related to the load application methodology presented: firstly, how accurately can  
420 equivalent concentrated loads represent the loading conditions of an actual distributed load (Section 4.1.1), and, secondly, what is the impact of applying concentrated loads in the internal DOFs of the FFRF-based reduced-order model studied (Section 4.1.2). The different options to achieve the latter (i.e., including or not internal load interfaces, modelled with interface modes or minimum strain energy interfaces) are investigated. In Section 4.2, this methodology is applied to an actual wind turbine blade, subjected to an aerodynamic load distribution obtained from a steady state analysis.

425 The static response computed by the FFRF-based reduced-order model from solid elements implemented in Exudyn is compared with the reference solution from the original solid FE model, created in Abaqus (Dassault Systèmes, 2023). HAWC2 is also included in the comparison, as an analogous FFRF-based model using beam elements, extensively used in wind energy research and industry. The models in Exudyn are generated from the mass and stiffness matrices of the solid FE model, exported from Abaqus. The cross-sectional properties of the beam in HAWC2 are computed using BECAS v4.0 (Blasques, 2012), which  
430 needs as input two-dimensional models of the cross-sections: for the isotropic beam, these are created in Abaqus; for the wind turbine blade, the aerostructural optimization framework for wind turbine design (AESOpt) (Zahle et al., 2024) is used. This framework interfaces with BECAS and creates the cross-sectional meshes of each blade section using the properties described with the WindIO wind turbine ontology (Bortolotti et al., 2022).

The static response is compared in terms of the global displacement and rotation (rotation vector) components computed  
435 by the different models. For the models implemented in Abaqus and Exudyn, the rotation corresponds to an average quantity calculated using the Kabsch algorithm (Kabsch, 1978) for selected cross-sections; for the HAWC2 beam model, the nodal rotation values ~~can be~~are used directly. The same global coordinate system is adopted in both structures analysed, with the  $x$ -axis along the cross-section width/chord (lateral direction), the  $y$ -axis along the cross-section height (transverse direction) and the  $z$ -axis along the beam span (axial direction).

440 The system size is used in the analysis as a measure of computational cost. For the FFRF-based models, it is calculated as the sum of the number of DOFs belonging to each sub-body (FF and flexible generalised coordinates) and the number of algebraic equations (constraint equations) needed to define the boundary and reference conditions~~and connect~~, as well as connecting the sub-bodies.

## 4.1 Isotropic beam

445 The structure analysed here is an isotropic beam of square cross-section ( $0.5 \times 0.5$  m) and length of 25 m. It is characterised by a Young's modulus of  $2.6 \times 10^7$  Pa and a Poisson's ratio of 0.3.

The system size of the models compared is shown in Table 1 and defined based on convergence studies. The reference Abaqus FE model is composed of 4000 solid elements of type C3D20R (quadratic brick elements with reduced integration) (Dassault Systèmes, 2023). Since only the static response is analysed, no fixed interface eigenmodes are included in the Hurty/Craig-  
450 Bampton reduction step of the Exudyn reduced-order models ( $n_{m_i} = 0$ ); the baseline number of interface modes ( $n_{m_b}$ ) is 18. In the HAWC2 beam model, one element per sub-body is considered.

The models and results presented in this section are available at Antunes (2025).

**Table 1.** System size of isotropic beam models.  $n_s$ : Number of sub-bodies,  $n_{DOF}$ : Number of degrees-of-freedom,  $n_{AE}$ : Number of algebraic equations.

| Model                  | $n_s$ | $n_{DOF}$ | $n_{AE}$ |
|------------------------|-------|-----------|----------|
| ABAQUS solid           |       | 67695     |          |
| HAWC2                  | 25    | 300       | 150      |
| Exudyn, $n_{m_b} = 18$ | 10    | 574       | 322      |

### 4.1.1 Distributed triangular surface load

The first load case consists of a distributed triangular surface load, described by  $q(z) = 2.4z$  [N/m<sup>2</sup>], such that its magnitude  
455 increases from zero at the clamped location to  $q = 60$  N/m<sup>2</sup> at the tip. It is applied at the middle surface of the beam with a fixed direction  $\mathbf{n} = [0 \quad -1 \quad 0]$ .

There are two different ways to model this load in Abaqus: by integrating it over the deformed surface area (i.e., integration is carried out on the current configuration in each load step), or over the reference surface area, which corresponds to having a constant resultant load (integration is only performed once and the nodal load vector is maintained constant during the solution  
460 procedure) (Dassault Systèmes, 2023). The first option is the one that better represents a wind load.

To assess how accurately multiple concentrated loads can produce the same nonlinear static response as that of the actual distributed load, the reference Abaqus solid FE model was simulated with different loading conditions: with the distributed load integrated over the deformed surface area (reference solution), with the distributed load integrated over the reference surface area ( $F_{res} = \text{const.}$ ), and with different number of concentrated loads. The equivalent concentrated loads are calculated as  
465 described in Section 3.1: the beam is divided into equal spanwise portions, for which the resultant loads and corresponding load application points are calculated using Gauss-Legendre quadrature.

The static displacements and rotations computed with the different loading conditions are shown in Figure 4, and the absolute and relative differences w.r.t. the Abaqus solution for the distributed load integrated over the deformed surface area can be seen

in Figure 5. There is a difference of around 3.5% for the transverse displacement ( $u_y$ ) and 7.5% for the axial displacement ( $u_z$ ) between the two distributed load solutions; this is expected for such large deflections.

The static response produced by the equivalent concentrated loads can only match that of the distributed load integrated over the reference area ( $F_{res} = \text{const.}$ ), which is what is observed in these results. Consequently, a certain error is always present when using equivalent concentrated loads to emulate distributed loads, since these are not recalculated as the structure deforms; this error increases with the deflection magnitude. It should be reminded that the current approach allows for the modelling of follower loads (i.e., the load direction can be updated as the structure deforms). However, since the deformed orientation is only assessed at the discrete load application points, this may also constitute a small additional source of error when follower loads are simulated.

As the number of concentrated loads is increased, the static response converges to that of ~~this distributed load; nevertheless,~~ the distributed load (with  $F_{res} = \text{const.}$ ). In fact, only a small number of load points is required to achieve an identical response to the one produced by the distributed load in question, with a difference lower than 1% between the multiple solutions.

~~It can therefore be expected that a small error is always present when using~~ Specifically, the maximum relative difference between the solution with 5 equivalent concentrated loads ~~to emulate distributed loads, due to the lack of update of the load vector as the structure deforms~~ and the original distributed load is solely 0.6%, and no differences are effectively observed when 50 equivalent concentrated loads are used.

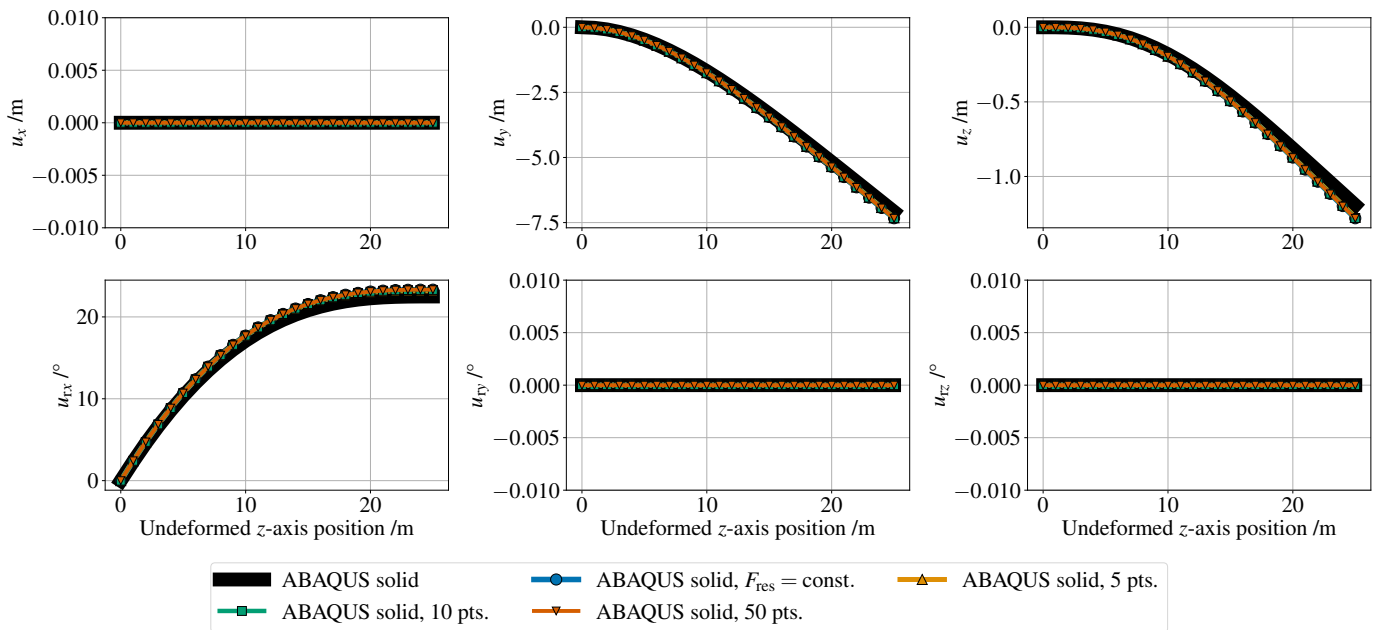

**Figure 4.** Isotropic beam subjected to distributed triangular load: Comparison of the static displacement and rotation (rotation vector) components computed by Abaqus using the actual distributed load or equivalent concentrated loads.

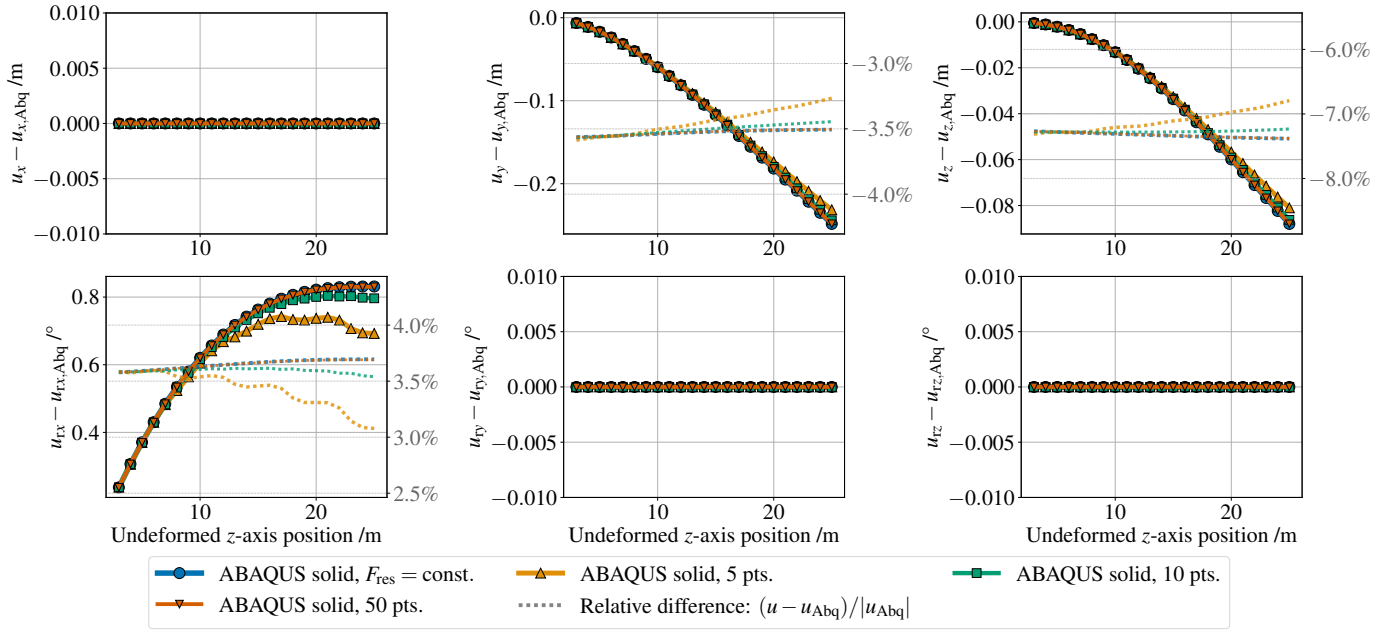

**Figure 5.** Isotropic beam subjected to distributed triangular load: Absolute and relative differences of the displacement and rotation components computed by Abaqus using the actual distributed load or equivalent concentrated loads.

485 **4.1.2 Multiple concentrated loads applied at internal DOFs**

In this load case, multiple concentrated loads are applied at certain spanwise locations of the isotropic beam. The transverse forces are back-calculated from the theoretical bending moment distribution corresponding to the application of a triangular distributed load, such that a tip transverse deflection of about 20% is obtained. The forces are assumed to be applied at the “quarter-chord” point of the cross-section, resulting in a torsional moment distribution as well. The load magnitudes and

490 locations are given in Table 2.

**Table 2.** Concentrated loads applied to isotropic beam.

| $z$ /m                  | 4       | 9       | 14      | 19      | 24      |
|-------------------------|---------|---------|---------|---------|---------|
| $F_y$ /N                | 16.927  | 39.062  | 60.764  | 82.465  | 48.466  |
| $M_z$ /Nm <sup>-1</sup> | -21.159 | -48.828 | -75.955 | -103.08 | -60.583 |

With this load case, the objective is to assess how the FFRF-based reduced-order models implemented in Exudyn handle the application of external loads at internal DOFs of sub-bodies. The baseline Exudyn model is the one referred to in Table 1, composed of 10 sub-bodies (each with a length of 2.5 m) generated with 18 interface modes. In this analysis, alternative versions of this model are considered: including a number of fixed interface modes ( $n_{m_i}$ ) in the Hurty/Craig-Bampton reduction,

495 including internal load interfaces using interface modes (IM), and including internal load interfaces using minimum strain  
 energy (MSE) interfaces. The reason behind the inclusion of internal load interfaces has been explained in Section 3.1 and lies  
 on the assumption of the Hurty/Craig-Bampton method that external loads are only applied to interface DOFs. The inclusion  
 of fixed-interface modes in this analysis aims at improving the basis these applied loads are projected onto – see Eq. (17) –,  
 especially when having torsional loads; a number of five fixed-interface modes is chosen to ensure that the first torsion mode is  
 500 included in the reduction basis. The system size of these additional models considered in the analysis is displayed in Table 3.

**Table 3.** System size of Exudyn models used in the multiple concentrated loads test case ([isotropic beam](#)).  $n_s$ : Number of sub-bodies,  $n_{DOF}$ :  
 Number of degrees-of-freedom,  $n_{AE}$ : Number of algebraic equations.

| Model                               | $n_s$ | $n_{DOF}$ | $n_{AE}$ |
|-------------------------------------|-------|-----------|----------|
| Exudyn, $n_{m_b} = 18$              | 10    | 574       | 322      |
| Exudyn, $n_{m_b} = 18, n_{m_i} = 5$ | 10    | 624       | 322      |
| Exudyn, $n_{m_b} = 18$ , IM intf.   | 10    | 664       | 322      |
| Exudyn, $n_{m_b} = 18$ , MSE intf.  | 10    | 604       | 322      |

The nonlinear static response computed by the different versions of the Exudyn models is compared with the reference  
 solution from Abaqus and the HAWC2 beam model in Figure 7. The corresponding absolute and relative differences w.r.t. the  
 reference Abaqus model are shown in Figure 8. A rendered view of the Exudyn solution for the baseline model is displayed in  
 Figure 6.

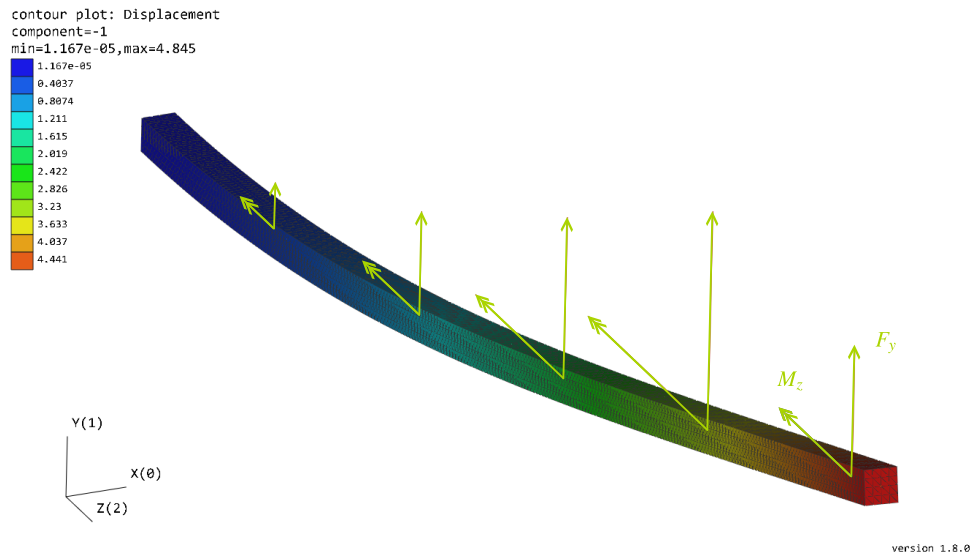

**Figure 6.** Rendered solution from Exudyn for isotropic beam subjected to multiple concentrated loads (baseline solution,  $n_{m_b} = 18$ ).

505 Overall, a good agreement is observed between all models, with the FFRF-based models (HAWC2 and the Exudyn models) showing similar relative differences w.r.t. the solid FE model from Abaqus, below 2% for the majority of displacement and rotation components (with the exception of  $u_x$  and  $u_{rz}$ , which are components of smaller magnitude, with the maximum value of  $u_x$  corresponding to 0.3% of the beam length).

When comparing the different versions of the Exudyn models, it is clear that the main challenge lies with the twist rotation component ( $u_{rz}$ ), for which the baseline model shows a jump in the difference with respect to the reference solution around the load application points (see Figure 8). Though the difference is small, it serves here to demonstrate the outcome of applying loads at internal DOFs. This difference is slightly lowered by including the torsion eigenmodes ( $n_{m_i} = 5$ ) in the reduction matrix of the sub-bodies, while the inclusion of internal load interfaces (both with interface modes or minimum strain energy interfaces) eliminates these jumps. The best results amongst the Exudyn models are obtained with the model including interface modes load interfaces (IM intf.), but the gains are marginal when compared to the baseline model.

510  
515

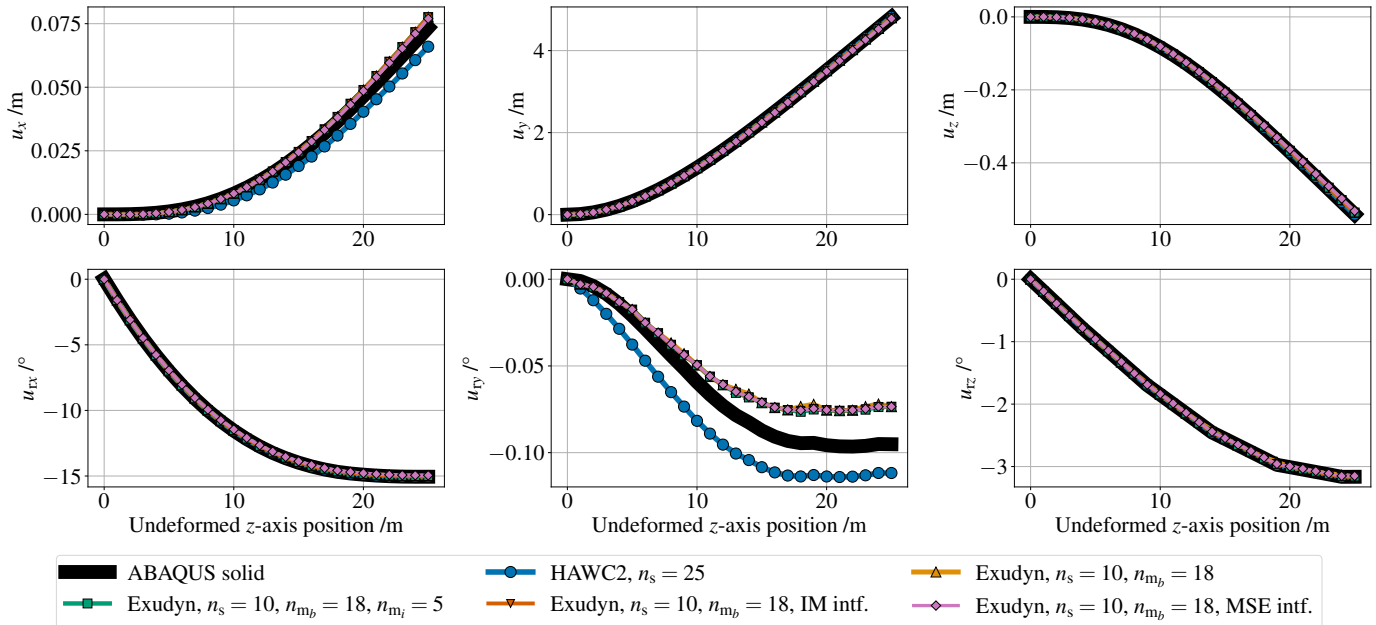

**Figure 7.** Isotropic beam subjected to multiple concentrated loads: Comparison of the static displacement and rotation (rotation vector) components computed by the different models.

While the model with minimum strain energy load interfaces (MSE intf.) also resolves the issue of increased error in twist rotation around load application points, it exhibits a less accurate response for the remaining deflection components when compared with the other Exudyn models. It computes a stiffer response, which is confirmed by the modal analysis performed on these models, shown in Figure 9. ~~Though~~ Although this model constitutes an alternative with fewer DOFs than the model with interface modes load interfaces, it is not an ideal solution, as the response computed is not as accurate as the baseline Exudyn model. It also requires a greater preprocessing effort to build the reduced-order model, as detailed in Section 3.1.1.

520

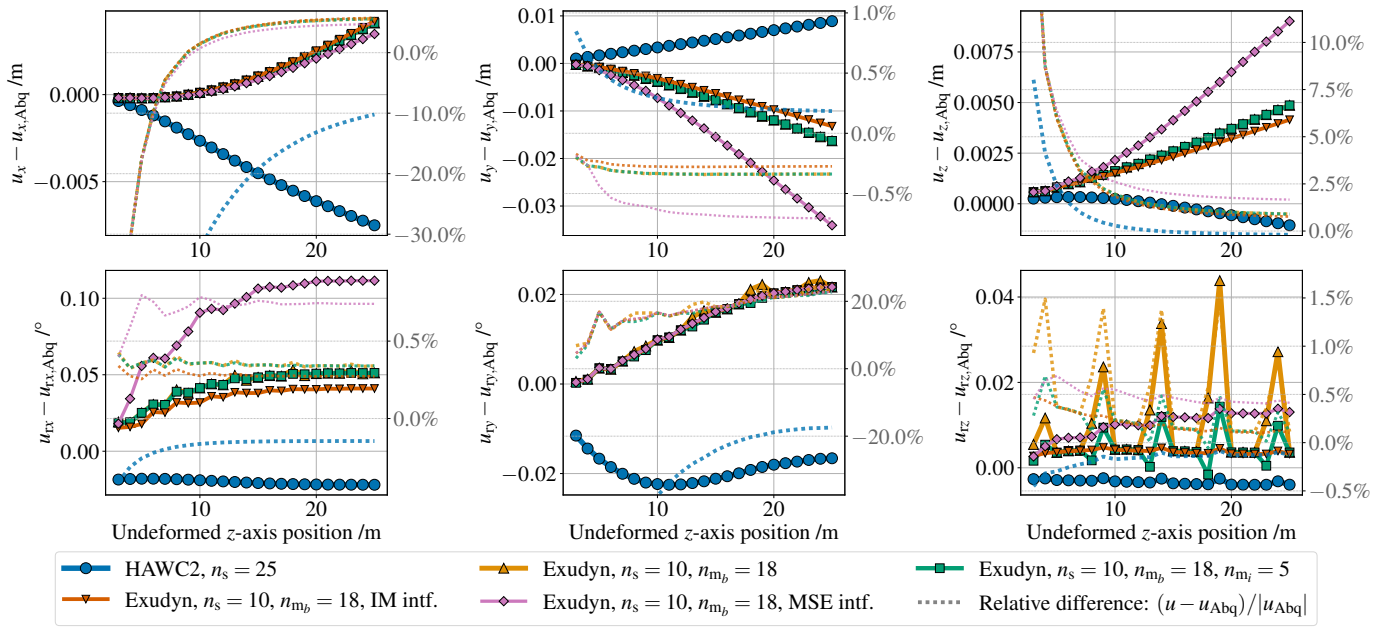

**Figure 8.** Isotropic beam subjected to multiple concentrated loads: Absolute and relative differences of the displacement and rotation components w.r.t. the reference Abaqus solid FE model.

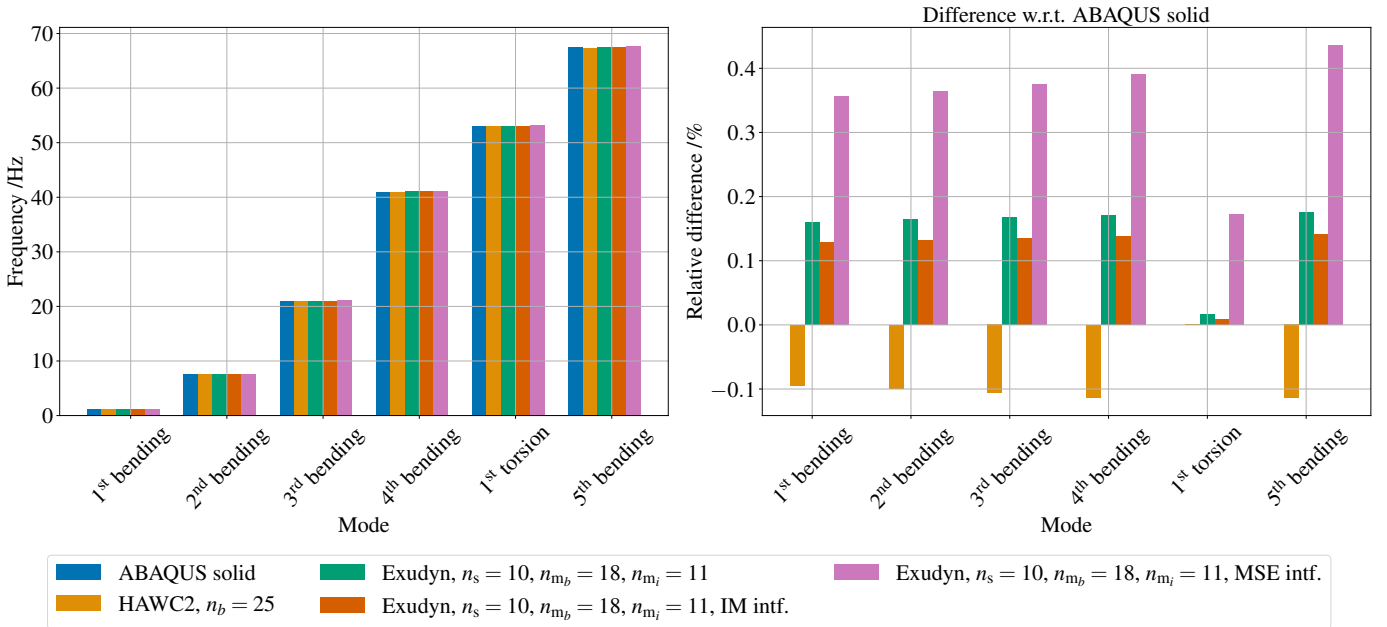

**Figure 9.** Isotropic beam: Natural frequencies comparison. Relative differences calculated as  $(f - f_{Abq})/f_{Abq}$ .

## 4.2 DTU 12.6 m wind turbine blade

The wind turbine blade analysed in this work has been designed and manufactured at DTU Wind and Energy Systems and is 12.6 m long (see Figure 10). It does not fully represent the state-of-the-art in modern pitch-regulated blades, as it was designed as a replacement for old 150 kW wind turbines, but it features the load-carrying shell concept, representative of current technology in terms of structural design (Haselbach et al., 2020b, a). It has been chosen due to the availability of a detailed structural (solid FE) model for a validated design, which is not provided for reference wind turbines at the present time. An analysis of this blade for similar loading conditions has been previously done in Antunes et al. (2024), including only the HAWC2 beam and high-fidelity FE models.

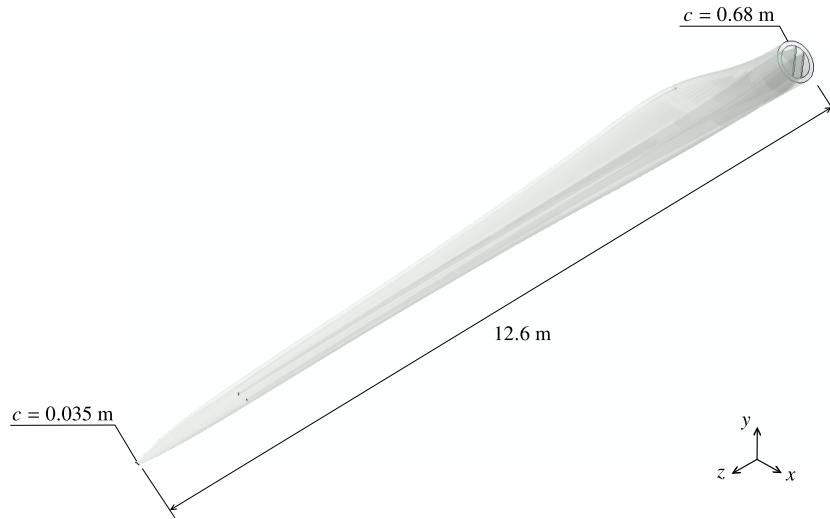

**Figure 10.** DTU 12.6 m wind turbine blade model.  $c$ : Chord length.

The system size of the models compared is shown in Table 4 and defined based on convergence studies. The reference Abaqus model is composed of 208744 solid elements of type C3D8R (linear brick elements with reduced integration) (Dassault Systèmes, 2023). Similarly to the isotropic beam models, no fixed-interface modes are included in the Hurty/Craig-Bampton reduction matrix of the Exudyn models, which are generated with 18 interface modes. The HAWC2 beam model is composed of 119 elements, distributed by the defined number of sub-bodies.

The loading conditions are based on the steady state aeroelastic analysis of the 150 kW wind turbine from Haselbach et al. (2020b). The aeroservoelastic stability analysis tool HAWCStab2 (Hansen et al., 2018; Hansen, 2004) is used to compute the distributed aerodynamic loads at rated wind speed ( $V_{\text{rat}} = 12$  m/s). The equivalent concentrated loads are calculated as described in Section 3.1, by integrating this aerodynamic load distribution over the blade length. Twenty load application points are considered, whose location is calculated from the distribution of the resultant in-plane forces ( $F_x, F_y$ ), as described in Section 3.1. The original aerodynamic distributed loads and equivalent concentrated loads are plotted in Figure 11. These are scaled by a factor of 4 in the current analysis, to be able to analyse geometrically nonlinear effects.

**Table 4.** System size of DTU 12.6 m blade models.  $n_s$ : Number of sub-bodies,  $n_{DOF}$ : Number of degrees-of-freedom,  $n_{AE}$ : Number of algebraic equations.

| Model                             | $n_s$ | $n_{DOF}$ | $n_{AE}$ |
|-----------------------------------|-------|-----------|----------|
| ABAQUS solid                      |       | 2433888   |          |
| HAWC2                             | 20    | 834       | 120      |
| Exudyn, $n_{mb} = 18$             | 11    | 541       | 309      |
| Exudyn, $n_{mb} = 18$ , IM intf.  | 11    | 913       | 315      |
| Exudyn, $n_{mb} = 18$ , MSE intf. | 16    | 914       | 456      |

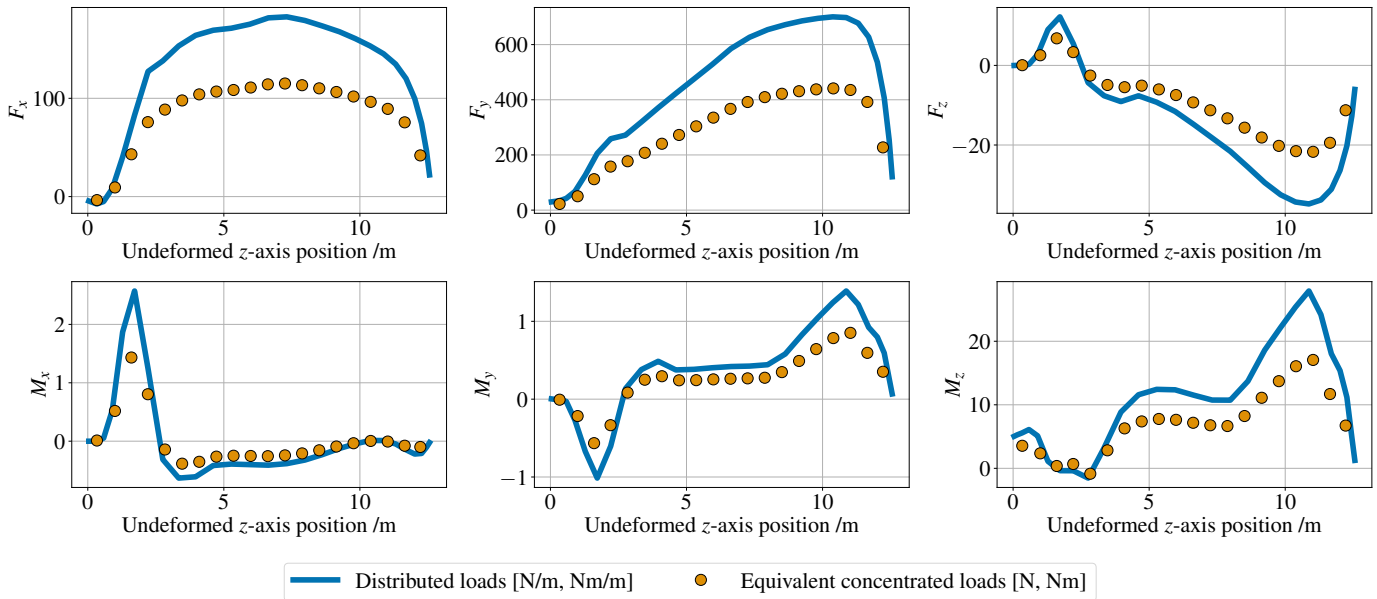

**Figure 11.** DTU 12.6 m blade: Steady state distributed aerodynamic loads and calculated equivalent concentrated loads (unscaled). Loads are given at the elastic centre, in the global coordinate system ( $z$ -axis towards blade tip;  $x$ -axis along blade root chordwise direction, towards leading edge;  $y$ -axis towards blade root suction side).

The nonlinear static response ~~produced by these loads~~ to these loads, computed by the different models, is shown in Figure 12, together with the absolute and relative differences w.r.t. the reference Abaqus solution, in Figure 13. ~~The~~ It can be seen that the HAWC2 beam and Exudyn models including only interface modes (with and without load interfaces) are in close agreement with the Abaqus solid FE model, with all displacement and rotation components being within 1-3% of the reference solution, with the exception of the torsion DOF ( $u_{rz}$ ). This is not the case for the Exudyn model including minimum strain energy (MSE) interfaces, which again computes a stiffer response than the remaining models; for example, the transverse displacement is 5% lower than the reference solution from Abaqus, while this difference is below 1% for the other FFRF-based models.

The largest discrepancy in the HAWC2 model is observed for the twist rotation component, which does not follow exhibit the same behaviour as the Abaqus solid FE model. This is the consequence of abrupt structural variations in the model, in this case, changes in materials and the start/end of the shear webs in the blade, whose impact on the response is not as well captured by a beam-model beam models, as these do not account for three-dimensional effects (Antunes et al., 2024). Since the FFRF-based reduced-order models implemented in Exudyn are based on the original solid FE model, they can better capture better these complex structural phenomena, while still having a significantly smaller system size than a full three-dimensional FE model.

Finally, it should be noted that the difference between the static response computed by the baseline Exudyn model and the one including interface modes (IM) load interfaces is minimal. These results seem to indicate that there is no clear advantage in adding internal load interfaces to such reduced-order models, for static analyses.

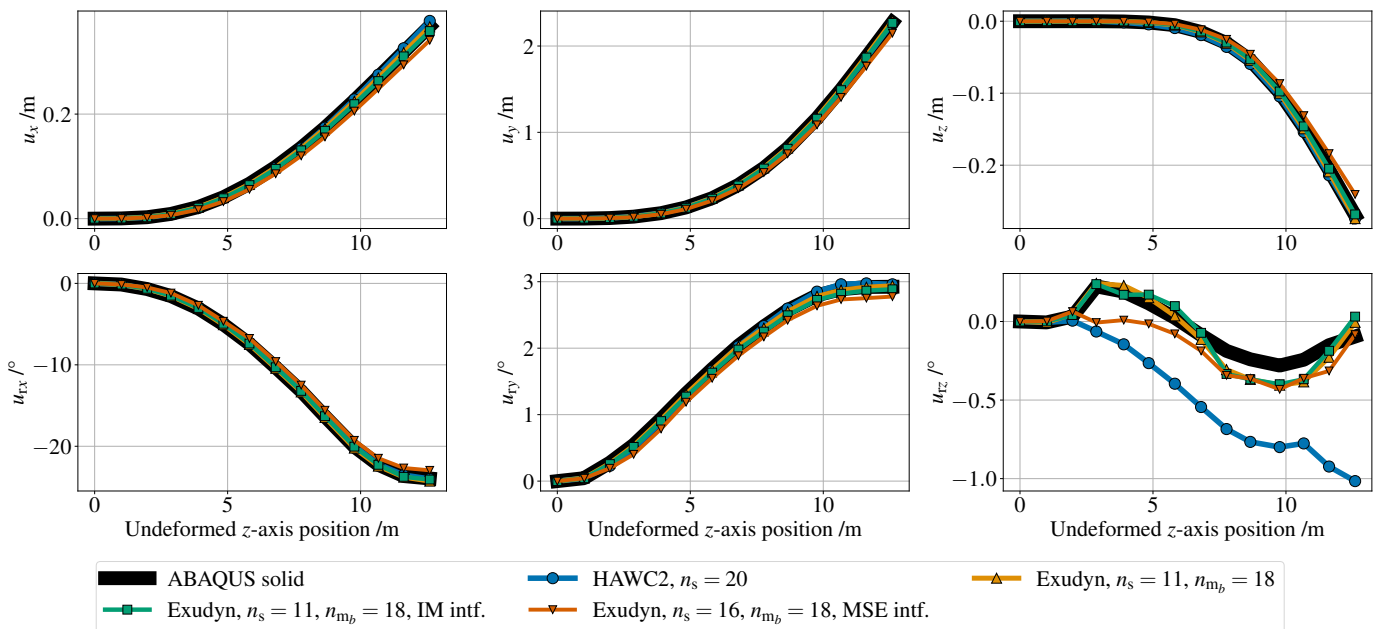

**Figure 12.** DTU 12.6 m blade: Comparison of the static displacement and rotation (rotation vector) components computed by the different models.

To support the nonlinear static analysis, a modal analysis was also performed: the natural frequencies of the various models under investigation are presented in Figure 14. The HAWC2 beam model considered in this study has a scaled mass distribution, in order to match the total blade mass of the Abaqus solid FE model; this means that the original mass distribution (obtained from BECAS) is multiplied by a factor of 1.05. A total of 8 fixed-interface modes is considered for the Exudyn models.

As previously observed for the isotropic beam model, the inclusion of method including minimum strain energy (MSE) interfaces leads to a stiffer model. The natural frequencies of the other two Exudyn models are in complete agreement with

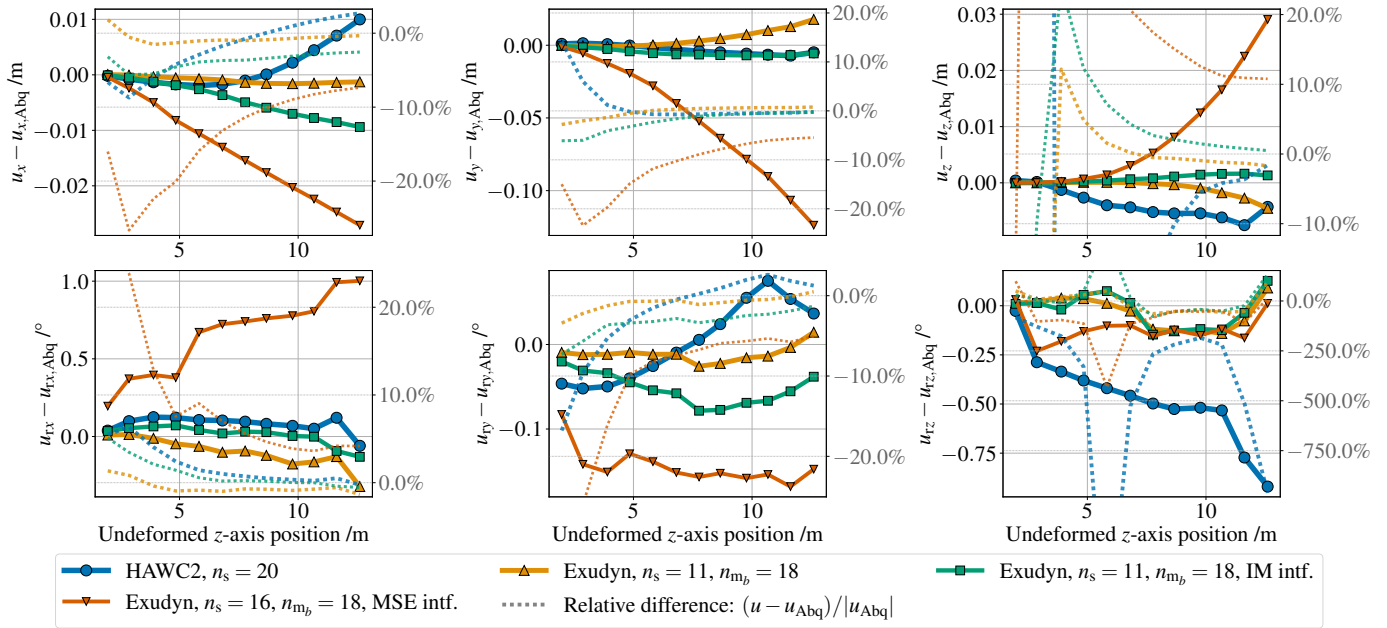

**Figure 13.** DTU 12.6 m blade: Absolute and relative differences of the displacement and rotation components w.r.t. the reference Abaqus solid FE model.

565 the original Abaqus solid model, within 1% for the baseline Exudyn model and 1-3% for the model including interface modes (IM) load interfaces.

A good match is also noted between HAWC2 and Abaqus for all eigenmodes except for the first torsion mode, in which a large difference (above 20%) is seen, confirming a well-know challenge in the modelling of wind turbine blades with beam models and highlighting the possible benefits of using the current reduced-order model based on solid finite elements (relative  
570 difference is below 1% for the torsion mode).

## 5 Conclusions

This paper presents a methodology to apply aerodynamic loads calculated with an aerodynamic BEM solver (typically found in ~~common~~ wind turbine aeroelastic simulation tools) to a multibody FFRF-based reduced-order model built from solid finite elements and including interface reduction (with interface eigenmodes). It addresses two main challenges: not being able to  
575 directly apply the spanwise distributed aerodynamic loads computed from the BEM aerodynamic solver to such a model, given its inherently different nature from a one-dimensional beam model; and requiring to apply loads at internal DOFs of the reduced-order model, which opposes the assumptions of the Hurty/Craig-Bampton method it is based on.

The proposed method consists of applying equivalent concentrated loads, calculated from the integration of the aerodynamic load distribution along multiple blade portions, at the “centroid” of the spanwise load distribution. Interpolation multipoint

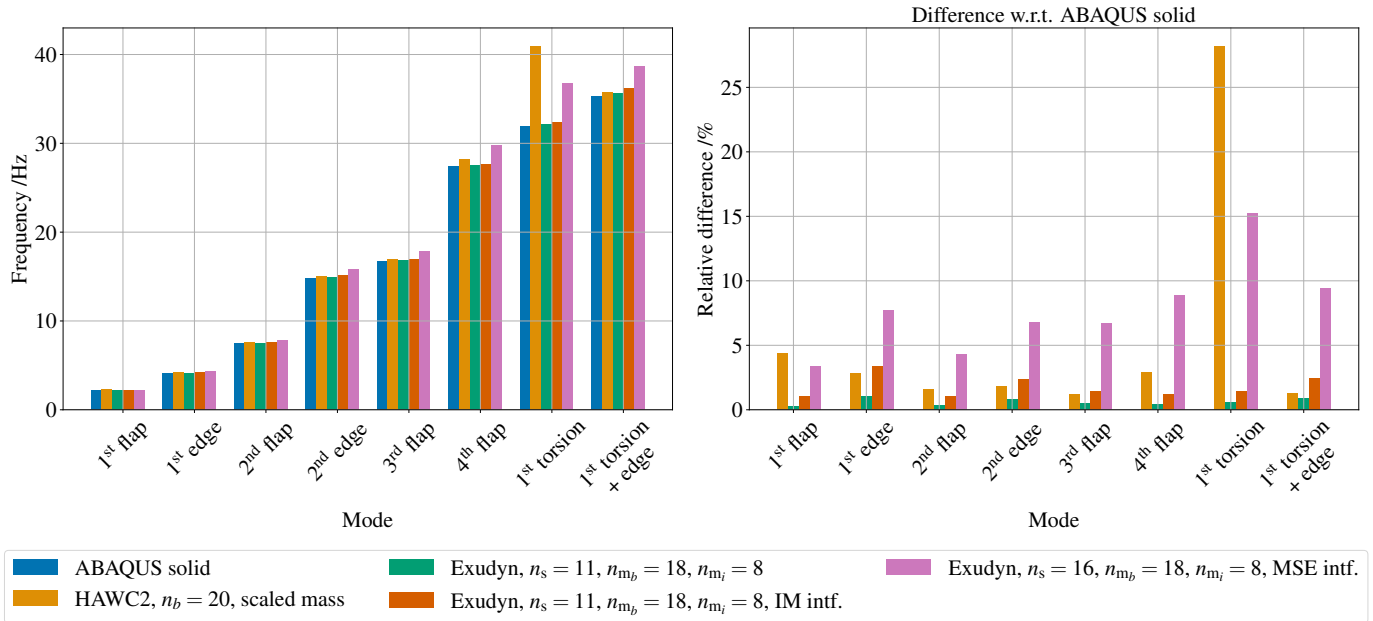

**Figure 14.** DTU 12.6 m blade: Natural frequencies comparison. Relative differences calculated as  $(f - f_{Abq}) / f_{Abq}$ .

580 constraints (RBE3) are used to apply the loads at each blade cross-section. These loads can be applied at any location of the reduced-order model by projecting them onto its subspace using the respective reduction basis. However, to avoid applying them at internal DOFs, two alternatives are presented, both based on adding interfaces at the load application locations: either using the same method employed for the existing substructuring interfaces (interface modes) or using the minimum strain energy formulation from Masarati et al. (2020), which is analogous to a RBE3 interface and therefore presents an option with

585 a lower system size. The different versions of the multibody FFRF-based reduced-order model from solid elements (including or not internal load interfaces) are implemented in the multibody code Exudyn.

Two structures are analysed to assess the proposed methodology: a simple isotropic beam and an existing 12.6 m wind turbine blade manufactured at DTU. The nonlinear static response of the different models is compared with the reference solution from Abaqus and with HAWC2, as a baseline multibody FFRF-based model with beam elements. It is concluded from the analysis

590 that applying equivalent concentrated loads is a reasonable approximation to distributed loads, though there will be an error resulting from not re-integrating the distributed load as the structure deforms; this error is expected to be more pronounced as larger deflections take place (an error of 7.5% is observed for a transverse displacement corresponding to approximately 30% of the beam length). With regard to the inclusion of internal load interfaces in the reduced-order models, it is found that it does not result in a significant gain in accuracy when compared to the baseline solution (without load interfaces). As

595 observed in Section 4.1.2, the increase in accuracy is more evident for the torsional component, especially when the magnitude of the torsion moment is sufficiently large, but the error can also be mitigated by including torsion modes in the Hurty/Craig-Bampton reduction basis. Additionally, it is shown that the method including minimum strain energy load interfaces results in

stiffer models and, consequently, less accurate static responses-: considering the DTU 12.6 m blade analysed, between 3-15% higher natural frequency values are computed w.r.t. the model without internal load interfaces.

600 The two multibody FFRF-based models considered in the analysis (HAWC2 and Exudyn) are in good agreement in the majority of cases, with the exception of the torsional behaviour of the DTU 12.6 m wind turbine blade. Both the twist response and torsional natural frequency computed by the HAWC2 beam model do not match the reference Abaqus solution, but those computed by the baseline Exudyn model do; namely, relative differences of approximately 28% and 1% are obtained for the torsional natural frequency with the HAWC2 and Exudyn models, respectively. This demonstrates the main advantage of the  
605 FFRF-based reduced-order models built from solid finite elements, in being able to replicate the response of a high-fidelity FE model to a higher degree.

With this methodology, it becomes more feasible to integrate such a model within the framework of a multibody FFRF-based aeroelastic simulation tool such as HAWC2. The present work is, however, only a first step in this direction: important challenges remain, particularly regarding its application to dynamic (aeroelastic) simulations and the resulting computational efficiency of such an approach. Future work should ~~also include an analysis of~~ therefore focus on analysing the dynamic  
610 response of this model, as well as its integration with a BEM-based aerodynamic solver. Another promising research direction is the coupling of this model with higher-fidelity aerodynamic models (e.g., 3D CFD, vortex lattice or panel methods) for applications beyond the one considered in this work.

*Code and data availability.* Data supporting the findings of this study are available at <https://doi.org/10.11583/DTU.30286369>. This dataset  
615 includes only the numerical models (Abaqus, Exudyn, and HAWC2) of the isotropic beam (Section 4.1). The numerical models of the DTU 12.6 m wind turbine blade (Section 4.2) are available from the corresponding author upon request.

*Author contributions.* A.M.A.: Conceptualization, Methodology, Software, Investigation, Formal analysis, Visualization, Data curation, Writing - original draft, Writing - review & editing. A.Z.: Methodology, Formal analysis, Writing - review & editing, Supervision. D.R.V., R.R., P.U.H., T.K.: Supervision, Writing - review & editing. All authors have read and approved the final manuscript.

620 *Competing interests.* DTU Wind Energy and Energy Systems develops, supports, and distributes HAWC2 on both academic (free) and commercial (non-free) terms.

## References

- Ahn, J. G., Yang, H. I., and Kim, J. G.: Multipoint constraints with Lagrange multiplier for system dynamics and its reduced-order modeling, *AIAA Journal*, 58, 385–401, <https://doi.org/10.2514/1.J058118>, 2020.
- 625 Allen, M. S., Rixen, D., van der Seijs, M., Tiso, P., Abrahamsson, T., and Mayes, R. L.: Model Reduction Concepts and Substructuring Approaches for Linear Systems, vol. 594 of *CISM International Centre for Mechanical Sciences*, pp. 25–73, Springer International Publishing, Cham, ISBN 978-3-030-25532-9, [https://doi.org/10.1007/978-3-030-25532-9\\_3](https://doi.org/10.1007/978-3-030-25532-9_3), 2020.
- Antunes, A. M.: Data for “Load application in wind turbine blades modelled as reduced-order multibody structures in the floating frame of reference formulation”, Dataset, Technical University of Denmark, <https://doi.org/10.11583/DTU.30286369>, 2025.
- 630 Antunes, A. M., Verelst, D. R., Riva, R., Kim, T., Haselbach, P. U., Zahle, F., and Berring, P.: Static response of wind turbine blades: Comparison of low- and high-fidelity numerical models, *Journal of Physics: Conference Series*, 2767, 052 037, <https://doi.org/10.1088/1742-6596/2767/5/052037>, 2024.
- Antunes, A. M., Verelst, D. R., Riva, R., Haselbach, P. U., and Kim, T.: Static Response of Beam-Like Structures for the Analysis of Wind Turbine Blades With Different Levels of Fidelity, in: *AIAA SciTech Forum*, <https://doi.org/10.2514/6.2025-1233>, 2025a.
- 635 Antunes, A. M., Zwölfer, A., Verelst, D. R., Riva, R., Haselbach, P. U., and Kim, T.: Modelling large deflections through reduced-order multibody structures in the floating frame of reference formulation, <https://doi.org/10.21203/rs.3.rs-7037424/v1>, PREPRINT (Version 1) available at Research Square, 2025b.
- Blasques, J. P. A. A.: User’s Manual for BECAS: A cross section analysis tool for anisotropic and inhomogeneous beam sections of arbitrary geometry, Risø DTU – National Laboratory for Sustainable Energy, Risøe-R No. 1785(EN) edn., 2012.
- 640 Bortolotti, P., Bay, C., Barter, G., Gaertner, E., Dykes, K., McWilliam, M., Friis-Moller, M., Molgaard Pedersen, M., and Zahle, F.: System Modeling Frameworks for Wind Turbines and Plants: Review and Requirements Specifications, Technical Report NREL/TP-5000-82621, National Renewable Energy Laboratory (NREL), <https://doi.org/10.2172/1868328>, 2022.
- Bottasso, C. L., Campagnolo, F., Croce, A., Dilli, S., Gualdoni, F., and Nielsen, M. B.: Structural optimization of wind turbine rotor blades by multilevel sectional/multibody/3D-FEM analysis, *Multibody System Dynamics*, 32, 87–116, <https://doi.org/10.1007/s11044-013-9394-3>,  
645 2014.
- Caous, D., Lavauzelle, N., Valette, J., and Wahl, J. C.: Load application method for shell finite element model of wind turbine blade, *Wind Engineering*, 42, 467–482, <https://doi.org/10.1177/0309524X18759897>, 2018.
- Craig Jr, R. R. and Bampton, M. C.: Coupling of substructures for dynamic analyses., *AIAA Journal*, 6, 1313–1319, 1968.
- Dassault Systèmes: SIMULIA User Assistance 2023: Abaqus, 2023.
- 650 DNV GL Energy: Bladed Theory Manual, [www.dnvgl.com/software](http://www.dnvgl.com/software), 2014.
- Forcier, L. C. and Joncas, S.: On the wind turbine blade loads from an aeroelastic simulation and their transfer to a three-dimensional finite element model of the blade, *Wind Engineering*, 44, 577–595, <https://doi.org/10.1177/0309524X19849861>, 2020.
- Gerstmayr, J.: Exudyn – A C++-based Python package for flexible multibody systems, *Multibody System Dynamics*, 60, 533–561, <https://doi.org/10.1007/s11044-023-09937-1>, 2024.
- 655 Gerstmayr, J.: Exudyn documentation, <https://exudyn.readthedocs.io/en/latest/index.html>, 2025.
- Glauert, H.: *Airplane Propellers*, pp. 169–360, Springer Berlin Heidelberg, Berlin, Heidelberg, ISBN 978-3-642-91487-4, [https://doi.org/10.1007/978-3-642-91487-4\\_3](https://doi.org/10.1007/978-3-642-91487-4_3), 1935.

- Gözcü, O. and Verelst, D. R.: The effects of blade structural model fidelity on wind turbine load analysis and computation time, *Wind Energy Science*, 5, 503–517, <https://doi.org/10.5194/wes-5-503-2020>, 2020.
- 660 Gözcü, O. and Dou, S.: Reduced order models for wind turbine blades with large deflections, *Journal of Physics: Conference Series*, 1618, 052046, <https://doi.org/10.1088/1742-6596/1618/5/052046>, 2020.
- Hansen, M. H.: Aeroelastic stability analysis of wind turbines using an eigenvalue approach, *Wind Energy*, 7, 133–143, <https://doi.org/10.1002/we.116>, 2004.
- Hansen, M. H., Henriksen, L. C., Tibaldi, C., Bergami, L., Verelst, D., Pirrung, G., and Riva, R.: HAWCStab2 User Manual, Department of  
665 Wind Energy, Technical University of Denmark (DTU), v2.15 edn., 2018.
- Haselbach, P. U., Semenov, S., and Berring, P.: DTU's blade research and demonstration platform, *IOP Conference Series: Materials Science and Engineering*, 942, 012043, <https://doi.org/10.1088/1757-899X/942/1/012043>, 2020a.
- Haselbach, P. U., Zahle, F., Berring, P., Semenov, S., Voltá, L., Roqueta, I., and Verelst, D. R.: Blade research and demonstration platform, *Journal of Physics: Conference Series*, 1618, 052073, <https://doi.org/10.1088/1742-6596/1618/5/052073>, 2020b.
- 670 Haselbach, P. U., Chen, X., and Berring, P.: Place smart, load hard - structural reinforcement of the trailing edge regions of a wind turbine blade strengthening the buckling resistance, *Composite Structures*, 300, <https://doi.org/10.1016/j.compstruct.2022.116068>, 2022.
- Hau, E. and Renouard, H.: *Wind Turbines: Fundamentals, Technologies, Application, Economics*, Springer Berlin, Heidelberg, Berlin, Heidelberg, 2 edn., ISBN 978-3-540-29284-5, <https://doi.org/10.1007/3-540-29284-5>, 2006.
- Hurty, W. C.: Dynamic analysis of structural systems using component modes, *AIAA Journal*, 3, 678–685, 1965.
- 675 Kabsch, W.: A discussion of the solution for the best rotation to relate two sets of vectors, *Acta Crystallographica Section A*, 34, 827–828, <https://doi.org/https://doi.org/10.1107/S0567739478001680>, 1978.
- Kim, T., Hansen, A. M., and Branner, K.: Development of an anisotropic beam finite element for composite wind turbine blades in multibody system, *Renewable Energy*, 59, 172–183, <https://doi.org/10.1016/j.renene.2013.03.033>, 2013.
- Knill, T. J.: The application of aeroelastic analysis output load distributions to finite element models of wind, *Wind Engineering*, pp. 153–168,  
680 <https://doi.org/10.1260/0309524054797104>, 2005.
- Krattiger, D., Wu, L., Zacharczuk, M., Buck, M., Kuether, R. J., Allen, M. S., Tiso, P., and Brake, M. R.: Interface reduction for Hurty/Craig-Bampton substructured models: Review and improvements, *Mechanical Systems and Signal Processing*, 114, 579–603, <https://doi.org/10.1016/j.ymsp.2018.05.031>, 2019.
- Larsen, T. J. and Hansen, A. M.: How 2 HAWC2, the user's manual, Department of Wind Energy, Technical University of Denmark (DTU),  
685 Risø-R-1597(ver. 12.9)(EN) edn., 2021.
- [Li, A., Gaunaa, M., Pirrung, G. R., and Horcas, S. G.: A computationally efficient engineering aerodynamic model for non-planar wind turbine rotors, \*Wind Energy Science\*, 7, 75–104, <https://doi.org/10.5194/wes-7-75-2022>, 2022.](https://doi.org/10.5194/wes-7-75-2022)
- [Li, A., Gaunaa, M., and Pirrung, G. R.: Computationally efficient aerodynamic modelling of swept wind turbine blades using coupled near-wake and vortex cylinder models, \*Wind Energy Science\*, 10, 2515–2550, <https://doi.org/10.5194/wes-10-2515-2025>, 2025.](https://doi.org/10.5194/wes-10-2515-2025)
- 690 Madsen, H. A., Larsen, T. J., Pirrung, G. R., Li, A., and Zahle, F.: Implementation of the blade element momentum model on a polar grid and its aeroelastic load impact, *Wind Energy Science*, 5, 1–27, <https://doi.org/10.5194/wes-5-1-2020>, 2020.
- Maheri, A., Noroozi, S., Toomer, C. A., and Vinney, J.: WTAB, a computer program for predicting the performance of horizontal axis wind turbines with adaptive blades, *Renewable Energy*, 31, 1673–1685, <https://doi.org/10.1016/j.renene.2005.09.023>, 2006.

- Masarati, P., Darbas, F., and Wander, I.: Compliant interface in component mode synthesis, in: Proceedings of the ASME 2020 International Design Engineering Technical Conferences and Computers and Information in Engineering Conference, ASME, <https://doi.org/10.1115/DETC2020-22255>, 2020.
- [Ramos-García, N., Sørensen, J. N., and Shen, W. Z.: Three-dimensional viscous-inviscid coupling method for wind turbine computations, Wind Energy, 19, 67–93, https://doi.org/10.1002/we.1821, 2016.](https://doi.org/10.1002/we.1821)
- [Ramos-García, N., Hejlesen, M. M., Sørensen, J. C., and Walther, J. H.: Hybrid vortex simulations of wind turbines using a three-dimensional viscous-inviscid panel method, Wind Energy, 20, 1871–1889, https://doi.org/10.1002/we.2126, 2017.](https://doi.org/10.1002/we.2126)
- Reissner, E.: On One-Dimensional Large-Displacement Finite-Strain Beam Theory, Studies in Applied Mathematics, 52, 87–95, <https://doi.org/10.1002/sapm197352287>, 1973.
- Riva, R., Pedersen, M. M., Pirrung, G., Bredmose, H., and Feng, J.: Incorporation of floater rotation and displacement in a static wind farm simulator, Journal of Physics: Conference Series, 2767, 062 019, <https://doi.org/10.1088/1742-6596/2767/6/062019>, 2024.
- Shabana, A. A.: Dynamics of Multibody Systems, Cambridge University Press, 2020.
- Simo, J.: A finite strain beam formulation. The three-dimensional dynamic problem. Part I, Computer Methods in Applied Mechanics and Engineering, 49, 55–70, [https://doi.org/10.1016/0045-7825\(85\)90050-7](https://doi.org/10.1016/0045-7825(85)90050-7), 1985.
- Wang, L., Liu, X., and Kolios, A.: State of the art in the aeroelasticity of wind turbine blades: Aeroelastic modelling, Renewable and Sustainable Energy Reviews, 64, 195–210, <https://doi.org/10.1016/j.rser.2016.06.007>, 2016.
- Wang, Q., Sprague, M. A., Jonkman, J., Johnson, N., and Jonkman, B.: BeamDyn: a high-fidelity wind turbine blade solver in the FAST modular framework, Wind Energy, 20, 1439–1462, <https://doi.org/10.1002/we.2101>, 2017.
- [Wu, S.-C. and Haug, E. J.: Geometric non-linear substructuring for dynamics of flexible mechanical systems, International Journal for Numerical Methods in Engineering, 26, 2211–2226, https://doi.org/10.1002/nme.1620261006, 1988.](https://doi.org/10.1002/nme.1620261006)
- Zahle, F., Li, A., Lønbæk, K., Sørensen, N. N., and Riva, R.: Multi-fidelity, steady-state aeroelastic modelling of a 22-megawatt wind turbine, Journal of Physics: Conference Series, 2767, 022 065, <https://doi.org/10.1088/1742-6596/2767/2/022065>, 2024.
- Zwölfer, A. and Gerstmayr, J.: A concise nodal-based derivation of the floating frame of reference formulation for displacement-based solid finite elements: Avoiding inertia shape integrals, Multibody System Dynamics, 49, 291–313, <https://doi.org/10.1007/s11044-019-09716-x>, 2020.
- Zwölfer, A. and Gerstmayr, J.: The nodal-based floating frame of reference formulation with modal reduction, Acta Mechanica, 232, 835–851, <https://doi.org/10.1007/s00707-020-02886-2>, 2021.
